1 *Title:*

2 CREB-binding protein gene, *HAC701*, negatively regulates WRKY45-dependent immunity  
3 in rice

4 *Running title:*

5 *HAC701*-dependent immunity regulation

6

7 *Authors:*

8 Nino A. Espinas<sup>1,4,\*</sup>, Tu Ngoc Le<sup>1,2</sup>, Saori, Miura<sup>1</sup>, Yasuka Shimajiri<sup>1,3</sup>, Ken Shirasu<sup>4</sup>,  
9 Hidetoshi Saze<sup>1</sup>

10

11 *Affiliation:*

12 <sup>1</sup>Okinawa Institute of Science and Technology Graduate University, Onna-son, Okinawa,  
13 Japan

14 <sup>2</sup>Bioinformation and DDBJ Center, National Institute of Genetics, Mishima, Shizuoka, Japan

15 <sup>3</sup>EditForce, Fukuoka, Japan

16 <sup>4</sup>RIKEN Center for Sustainable Resource Science, Yokohama, Kanagawa, Japan

17

18

19

20 *Contact:*

21 \*Correspondence to: Nino A. Espinas (nino.espinas@riken.jp)

22

23

24

25

26 *Category:*

27 Biological Sciences, Plant Biology

28 **SIGNIFICANCE**

29 HAC701 is a member of CREB-binding protein (CBP) family that acts as transcriptional  
30 coactivator and acetyltransferase. However, little is known how it regulates innate immunity  
31 in plants. Herein we reported that rice *HAC701* suppresses WRKY45-dependent defense  
32 pathway. Our study showed that *HAC701* seemingly interacts genetically with *WRKY45* in rice  
33 to modulate immune responses against pathogens.

34

35

36

37

38

39

40

41

42

43

44

45

46

47

48

49

50

51

52

53

54

55

56 **ABSTRACT**

57 CREB-binding protein (CBP) is a known transcriptional coactivator and an acetyltransferase  
58 that functions in several cellular processes by regulating gene expression. However, how it  
59 functions in plant immunity remains unexplored. By characterizing *hac701*, we demonstrate  
60 that *HAC701* negatively regulates the immune responses in rice. *hac701* shows enhanced  
61 disease resistance against a bacterial pathogen, *Pseudomonas syringae* pv. *oryzae* (*Pso*), which  
62 causes bacterial halo blight of rice. Our transcriptomic analysis revealed that rice *WRKY45*,  
63 one of the main regulators of rice immunity, is upregulated in *hac701* and possibly conferring  
64 the resistance phenotype against *Pso*. The morphological phenotypes of *hac701* single mutants  
65 were highly similar to *WRKY45* overexpression transgenic lines reported in previous studies.  
66 In addition, we also compared the list of genes in these studies when *WRKY45* is overexpressed  
67 and chemically induced transiently with the differentially expressed genes (DEGs) in *hac701*,  
68 and found that they largely overlap. When we investigated for *cis*-elements found 1kb upstream  
69 of *WRKY45* gene and *WRKY45*-dependent DEGs, we found that *WRKY45* promoter contains  
70 the CRE motif, a possible target of *HAC701*-mediated regulation. Genome-wide H3K9  
71 acetylation profiling showed depletion of acetylation at large set of genes in *hac701*. However,  
72 consistent with the upregulation of *WRKY45* gene expression, our ChIP-sequencing analysis  
73 demonstrated that regions of *WRKY45* promoter are enriched in H3K9 acetylation in *hac701*  
74 compared to the segregated wild type control in the mock condition. *WRKY45* promoter might  
75 be on the receiving end for possible genome-wide compensatory effects when a global  
76 regulator like *HAC701* is mutated. Finally, we show that *HAC701* may have roles in systemic  
77 immune signaling. We therefore propose that wild type *HAC701* negatively regulates *WRKY45*  
78 gene expression, thereby suppressing immune responses.

79

80

81

82

83

84 *Keywords:*

85 *Oryza sativa*, rice CREB-binding protein, *HAC701*, *WRKY45*, innate immunity,  
86 *Pseudomonas syringae* pv. *oryzae* (*Pso*), *Magnaporthe*

## 87 INTRODUCTION

88 Histone acetyltransferases (HATs) are a diverse group of histone- and non-histone-modifying  
89 enzymes that contain multiple subunits to enable catalytic functions (1). These HATs primarily  
90 function as scaffolding bridges of proteins to form the transcriptional regulatory complex  
91 important for target recognition and subsequent substrate modification (1-3). The association  
92 of HATs to its interacting proteins and the existing state of the epigenome dictates the dual-  
93 switch functionality of either transcriptional activation or repression (1). They are considered  
94 integrators or adaptors as they were shown to interact with DNA-binding activators and the  
95 basal transcriptional machinery (4, 5).

96 In plant model Arabidopsis, HATs and histone deacetylases (HDACs) are grouped into  
97 four (Figure 1A) and three families, respectively (6). HATs consists of CBP, TAF1/TAFII250,  
98 GNAT, and MYST, while HDACs are RPD3/HDA1, HD2-like, and SIR2. A previous review  
99 of HATs and HDACs in plants listed about 12 putative HAT and 18 HDAC proteins exhibiting  
100 acetylation and deacetylation activities with differential site specificities (6). Work on rice  
101 (*Oryza sativa*), however, has just begun with a preliminary investigation of eight histone  
102 acetyltransferases (7, 8) and deacetylases (9).

103 Several studies have shown that histone acetylation and deacetylation control defense  
104 signaling in plants in response to phytohormone or pathogen application (10-12). More  
105 specifically, HATs and HDACs in rice model were shown to be responsive to abiotic stresses  
106 and can be modulated by phytohormones, thus implicating a role in biotic stresses (7, 13).  
107 Similar to Arabidopsis, HATs in rice are also classified into four families (Figure 1A) (7). In  
108 contrary, rice HDACs are represented in only two families, RPD3/HDA1-like and SIR2-like  
109 with no known rice member belonging to HD2 family (9).

110 *OsHAC701* was reported (14) earlier as a putative rice CBP-related acetyltransferase,  
111 herein after referred to as *HAC701*, of the p300/CBP acetyltransferase (PCAT) family of  
112 proteins. The Arabidopsis genome contains five CBP genes, while rice genome contains three  
113 (Figure 1A), having broad acetyltransferase specificity on histones (7). Currently, there is no  
114 clear consensus on the similarity of biological functions of Arabidopsis and rice homologs of  
115 CBP family proteins. In animals, p300 and CBP are paralogs and originally described as  
116 transcriptional coactivator that exhibit histone acetyltransferase activity on all four core  
117 histones specifically at H4 N-terminal tail sites K5, K8, K12, and K16 (15, 16). Other sites  
118 include H3 sites K14, 23 (17), K18, K27 (18, 19), and K56 (20); H2B sites are K12 and K15  
119 (21). H3K9 is mainly acetylated by GCN5/PCAF (18), however acetylation by p300/CBP was  
120 also reported (17, 22, 23). Its highly conserved function is mainly found in multicellular  
121 organisms as it probably participates in complex physiological processes acting as a limiting  
122 factor in various pathways due to its high cellular demand (14).

123 As HATs have been shown to be modulated by biotic stresses (24), we hypothesized  
124 that it could be a potential system for studying rice immunity. Indeed, we show that *HAC701*  
125 is involved in rice innate immunity. In this study, we have made CRISPR/Cas9 edited *hac701*  
126 lines and showed that *HAC701* is apparently a negative regulator of immunity with the mutants  
127 showing resistance against bacterial and fungal infection. Further transcriptomic investigation  
128 showed that *HAC701* possibly regulates *WRKY45* loci, one of the main regulators of rice  
129 immunity pathways. In *hac701*, *WRKY45* and its direct and indirect gene targets were  
130 upregulated upon pathogen inoculation. In addition, *hac701* phenocopies *WRKY45*-  
131 overexpression (*WRKY45-ox*) lines, indicating a potential interaction between *HAC701* and  
132 *WRKY45*-dependent immunity pathway in rice.

133

## 134 RESULTS

### 135 **Characterization of a rice acetyltransferase mutant, *HAC701*.**

136 We isolated null mutant lines by independently targeting two sites of *HAC701* gene (Fig. S1A-  
137 C; Fig. S1D-I) using CRISPR/Cas9 editing technology. From the 11 positive *HAC701* lines  
138 (Target 2), we have isolated four biallelic homozygous mutant lines (Fig. S1D), which we  
139 utilized for experimentation including their segregating wild type siblings, 9-WT (Fig. 1B).  
140 The phenotype in terms of effective grain number and tiller number of mostly all biallelic  
141 homozygous mutants at T2 generation did not show impairment as compared to 9-WT (Fig.  
142 S1F). In addition, the T3 lines did not show any visible growth or developmental defect in  
143 height and photosynthesis (*e.g.* chlorosis phenotype) (Fig. S1G), respectively. However, the  
144 weights of 1000-grain T3 and T4 generations of mutants were increased compared to 9-WT  
145 (Fig. S1I). These results indicate that a loss of *HAC701* does not cause severe developmental  
146 defects in rice, and that *HAC701* may have a positive role in seed production.

### 147 ***HAC701* mutant rice is resistant to pathogen infection.**

148 Our expression analysis of the rice HAT genes showed that *HAC701* is significantly up-  
149 regulated by treatment of bacterial flg22 peptide, suggesting a potential role of *HAC701* in  
150 plant defense against pathogens (Fig. S2). To investigate the involvement of *HAC701* in basal  
151 defense in rice, we inoculated 9-WT and *HAC701* mutant lines, *9-5<sup>-/-</sup>*, *9-12a<sup>-/-</sup>*, and *9-12b<sup>-/-</sup>* with  
152 mock (10 mM MgCl<sub>2</sub>) and *Pseudomonas syringae* pv. *oryzae* (*Pso*) (OD = 0.2; resuspended in  
153 10 mM MgCl<sub>2</sub>) for 72 h. *Pso* is a causative agent of halo blight in rice characterized by brown  
154 lesions and yellow halo-like blotches on leaves (25). Infection of *Pso* showed that *hac701* was  
155 resistant to *Pso*-treatment as compared to 9-WT (Fig. 1C; Fig. S3). These data suggest that  
156 *HAC701* might be involved in the regulation of rice innate immunity acting in its capacity as a  
157 transcriptional coactivator and/or as an acetyltransferase. We further tested whether *hac701*

158 also shows resistance phenotype when infected with a rice blast pathogen, *Magnaporthe*  
159 *oryzae*. Although the data were not statistically significant, results showed a resistant  
160 phenotype tendency in *hac701* (Fig. 1D). Overall, these indicate that *HAC701* plays a negative  
161 role in rice innate immunity.

## 162 **Transcriptome profiling of the rice-*Pso* pathosystem.**

163 To profile the genome-wide effect of *HAC701* mutation in rice innate immunity, we performed  
164 RNA-sequencing on mock- and *Pso*-treated 9-WT and *hac701* using local leaf tissues (Fig. S4;  
165 Table S2). We first characterized the effect of *Pso* infection on 9-WT and analysis of the highly  
166 variable genes in mock- and *Pso*-treated 9-WT plants showed gene clusters that were  
167 dependent on *Pso* induction alone (Fig. S4; Fig. S5). The top 10 highly variable genes across  
168 the 9-WT samples showed features involved in tolerance and/or resistance such as disease  
169 resistance and stress tolerance mostly by catalysis of primary and secondary metabolism (Fig.  
170 S5). This includes well-documented genes involved in plant resistance against pathogens, such  
171 as tryptophan decarboxylase 1 (Os08g0140300) that catalyzes the production of serotonin via  
172 conversion of tryptophan to tryptamine in rice (26), which has been implicated to confer  
173 resistance in rice infected with *Bipolaris oryzae* (27). Another gene, naringenin 7-O-  
174 methyltransferase (Os12g0240900), that catalyzes the production of rice phytoalexin  
175 sakuranetin has been reported to participate in rice defenses via JA signaling (28, 29). Lignin  
176 and phytoalexin encoding genes for instance laccases (*e.g.* Os12g0258700, Os11g0641500)  
177 and cytochrome P450s (*e.g.* Os07g0218700, Os08g0508000) are metabolic products known to  
178 be involved in plant defenses as well (30-32). Gene Ontology (GO) analysis of upregulated  
179 genes in *Pso*-infected 9-WT plants revealed enrichment of genes involved in response to biotic  
180 stimulus (GO terms: Response to wounding, Response to other organism, Cell wall  
181 macromolecule catabolic process, *etc.*) (Fig. S6; Table S3). Both up and downregulated genes  
182 showed enrichment of transcriptional machinery regulation, a possible consequence of

183 defense-related transcriptional reprogramming processes during bacterial invasion. GO  
184 analysis also identified pathways associated with upregulated gene networks involved in plant  
185 defense such as diterpene phytoalexin biosynthetic pathway and chorismate biosynthesis.  
186 Thus, the rice-*Pso* pathosystem is a functional system to analyze defense responses of rice  
187 against *Pso* infection.

188 **Potentiated *WRKY45* gene in *hac701* provides resistance against *Pseudomonas* and**  
189 ***Magnaporthe* infections.**

190 To investigate the molecular basis of resistance phenotype observed in *Pso*-infected *hac701*,  
191 we further analyzed our transcriptome data and found 141 upregulated genes in *hac701* (Fig.  
192 S7A; Table S4). We refer to these genes as *HAC701*-repressed genes. GO analysis of *HAC701*-  
193 repressed genes showed enrichment of processes involved in response to xenobiotic stimuli  
194 and defense response (GO terms: Response to xenobiotic stimulus, Response to wounding,  
195 Regulation of defense response, Jasmonic acid mediated signaling pathway, Defense response,  
196 *etc.*). These genes were lowly expressed in the 9-WT background. On the other hand, 336  
197 upregulated genes in the 9-WT background alone referred to as *HAC701*-independent genes  
198 did not show a very distinct enrichment of genes in defense responses yet rather showed a more  
199 general biological and physiological processes (GO terms: Mitochondrial respiratory chain  
200 complex IV assembly, Alanine transport, Cellular response to heat, *etc.*) (Fig. S7A; Table S3).  
201 We also looked into the features of 31 downregulated genes in the mutant background referred  
202 to as *HAC701*-enhanced genes (Fig. S7B; Table S4). These genes were not normally  
203 downregulated in the 9-WT background. *HAC701*-enhanced genes contained genes enriched  
204 in photosynthetic and response to abiotic stress terms (GO terms: Glycerolipid biosynthetic  
205 pathway, Response to cold, Photosynthesis, *etc.*). In addition, the remaining 46 downregulated  
206 genes in the 9-WT background alone also showed a more general biological processes with no



207 hint of enrichment in defense response against pathogen infection (GO terms: Chloroplast  
208 organization, Gluconeogenesis, Organelle fission, *etc.*) (Fig. S7B; Table S3).

209 We were intrigued what genes were affected in *HAC701* mutant background without  
210 *Pso*-treatment. Thus, we analyzed the transcriptome of mock-treated *hac701*, and found a small  
211 number of DEGs (98 genes; Table S5) mainly enriched in NADH dehydrogenase complex  
212 assembly and photosynthesis. This is in contrast with the number of DEGs found in *Pso*-treated  
213 *hac701* transcriptome, which yielded 660 genes (Table S6). These results simply indicate that  
214 *Pso* induced the expression of substantial number of genes in *hac701*. To fully understand the  
215 role of *HAC701* in *Pso*-treated conditions, we overlapped the list of genes derived from mock  
216 and *Pso*-treated mutants, and found *WRKY45* (*OsWRKY45*) upregulated in the *hac701*  
217 background in mock-treated *hac701* (Fig. 2A). *WRKY45* was also identified as one of the 141  
218 upregulated genes in *Pso*-infected *HAC701* mutant (Fig. S7A). There was no candidate gene  
219 found downregulated in *HAC701* mutant background alone (Fig. 2A). We then checked  
220 whether there were differences in the upregulation strength of *WRKY45* in the *HAC701*  
221 mutation alone, compared to *HAC701* mutation combined with *Pso*-treatment. Transcriptome  
222 data revealed that *WRKY45* expression was increased by about 20% upon *Pso*-treatment (Fig.  
223 2B). These results suggest that *WRKY45* expression is partially dependent on *HAC701*  
224 mutation. In addition, *Pso*-treatment allowed the co-expression of genes downstream of  
225 *WRKY45* pathway in a *HAC701*-dependent manner.

#### 226 ***hac701* phenocopy *WRKY45* overexpression transgenic plants.**

227 To determine whether the upregulation of *WRKY45* in *hac701* is relevant to rice with  
228 overexpressed *WRKY45*, we compared the DEGs in our *hac701* with *WRKY45* overexpression  
229 (*WRKY45-ox*) lines previously reported (in these studies: 33, 34). Our results indicated a  
230 striking similarity of targeted genes from rice samples despite the fact that they were inoculated

231 with two different types of pathogens, a bacterial (*Pso*; this project) and the fungal pathogen  
232 *Magnaporthe* (33, 34) and minor differences in sampling time periods (Fig. 3). In addition, we  
233 then analyzed whether benzothiadiazole-responsive genes (Fig. 3A; Table S6; Table S7)  
234 would overlap with *HAC701* mutant-DEGs in *Pso*. It is known that benzothiadiazole (*i.e.*  
235 BTH is a synthetic analog of salicylic acid, SA) robustly induces defense genes in rice (34, 35),  
236 which usually contains high levels of SA. As a result, about 43.3% (286/660 genes;  $P < 3.336e-$   
237 161) of *HAC701* mutant-DEGs in *Pso* overlapped with BTH-responsive genes, while about  
238 12.4% (82/660 genes;  $P < 2.368e-79$ ) of the *HAC701* mutant-DEGs in *Pso* overlapped with  
239 BTH- and WRKY45-regulated genes (Fig. 3B; Table S8). Furthermore, genes upregulated in  
240 plants expressing DEX-induced myc-tagged WRKY45 protein in rice were mostly found in  
241 *HAC701* mutant-DEGs in *Pso* (75% or 9/12 genes; Table S9). Our analysis also showed that  
242 at most 9.1 % (60/660 genes;  $P < 3.986e-15$ ) of the *HAC701* mutant-DEGs in *Pso* were  
243 regulated in BTH- and NPR1/NH1-dependent manner (Fig. 3B; Table S10). The rice  
244 NPR1/NH1 is an independent immune signaling pathway that mediates gene responses through  
245 BTH/SA-induction (Fig. S18). We then analyzed the 72 *HAC701* mutant-DEGs in *Pso* that  
246 were exclusively regulated by BTH- and WRKY45 as well as the other 10 genes jointly  
247 regulated by WRKY45 and NPR1/NH1 under BTH treatment (Fig. 3B-D). We found that most  
248 of these *HAC701* mutant genes were genuine WRKY45-regulated genes (Fig. 3C-D) (33, 34).  
249 Analysis of these WRKY45-dependent defense-related genes showed that in the presence of  
250 *Pso*-infection, a number of glutathione-S-transferase (GST) gene, were more upregulated in 9-  
251 WT than in *hac701* (Fig. 3D). These results were also consistent with the result that  
252 *OsWRKY62*, a known negative regulator and direct target of *OsWRKY45* (34), had lower  
253 transcription level in *HAC701* mutants (Fig. 3D). It is interesting that genes in JA biosynthesis,  
254 signaling and perception tend to be more highly expressed in *HAC701* mutant than 9-WT (Fig.  
255 3D). In addition, *HAC701* mutant genes that were found regulated in BTH and *WRKY45* indeed

256 contain W-box motifs (i.e. binding motifs for WRKY transcription factors, 36), raising more  
257 the possibility that these genes are direct WRKY45 targets (72/82 or 87.8%; Table S11).  
258 Meanwhile, all 10 genes that were commonly regulated in BTH, *WRKY45*, and *NPRI/NHI*  
259 (Fig. 3) contain W-box motifs as well (10/10 or 100%; Table S12). Taken together, these results  
260 indicate that upregulation of *WRKY45* expression as an outcome of *HAC701* mutation resulted  
261 in expression profile of genes almost identical to overexpressing *WRKY45* transgenic lines as  
262 well as to DEX-inducible *WRKY45* expression system. These also suggest that a significant  
263 fraction of *HAC701* mutant DEGs are probably WRKY45-regulated, given the presence of W-  
264 box motif.

265 Surprisingly, the upregulation of *WRKY45* expression in *hac701* did not result in any  
266 visible morphological defects (Fig. S1G). This indicates that *WRKY45* does not pose growth  
267 penalties, at least in this case where there is no pathogen applied.

#### 268 ***WRKY45* promoter contains CRE motif.**

269 Rice HAC701 and two others, HAC703 and HAC704, belong to the CBP [Cyclic adenosine  
270 monophosphate response element-binding protein (CREB) Binding Protein] family group of  
271 proteins that is known to bind CREB transcription factor through its KIX domain (7, 37).  
272 Therefore, we examined *in silico* the members of rice CBP family for the presence of KIX  
273 domains using a KIX domain database (38). Our results showed that only HAC701 and  
274 HAC703 proteins contain the highly conserved KIX domain (Fig. S8). Although we have not  
275 identified CREB-like transcription factor candidates in rice so far, we further examined the  
276 DNA motifs in the 1kb promoter regions of the 660 *HAC701* mutant-DEGs in *Pso* that might  
277 potentially bind to KIX-CREB-like transcription factor. Our DNA motif analyses result  
278 showed 49 significantly enriched motifs in promoters (Table S13; E-value <0.05). We then  
279 used these motifs to compare against a database of known motifs and found a CRE motif when

280 the query sequence CGRCGRCG (E-value<1.5e-27) was used (Fig. S9A). The CRE motif is  
281 a well-known sequence motif in animals usually bound by KIX-CREB transcription factor  
282 complex (39). We then searched for genes that contain the CRE motif and found that only five  
283 genes (0.76%) contain full CRE motif (Fig. S9B; Table S6). To our surprise, *WRKY45*  
284 promoter contains the full CRE motif that could possibly be targeted via KIX domain and  
285 CREB-like transcription factor-dependent regulation in rice system (Fig. S9C). These data  
286 show that *WRKY45* promoter could possibly be *cis*-regulated by HAC701 through its KIX  
287 domain, while the occurrence of CRE motif is not necessarily associated with other HAC701-  
288 regulated genes.

289 **Genome-wide investigation of histone modifications and enriched gene targets in *HAC701***  
290 **mutant.**

291 The CREB-binding protein (CBP) is also known to regulate gene expression by acetylating  
292 histone tails in both animals and plants (40). Thus, we performed chromatin  
293 immunoprecipitation coupled to sequencing (ChIP-seq) analysis on histone markers associated  
294 with active and repressive chromatin to examine the landscape of chromatin modifications in  
295 *HAC701* mutant. We performed ChIP-seq analyses of H3K9 acetylation (H3K9ac), H3K27  
296 acetylation (H3K27ac), H3K9 di-methylation (H3K9me2), and H3K9 tri-methylation  
297 (H3K9me3) on untreated 9-WT and *9-12b*<sup>-/-</sup> mutant (Fig. S10; Table S14). Metaplot profiles of  
298 these histone modifications were generated for genes, transposable elements (TEs), and simple  
299 repeats (Fig. S11; Fig. S12). The enrichment profiles show that both H3K9ac and H3K27ac  
300 accumulated in genes mainly along the transcriptional start site (TSS) and tapering through the  
301 gene body regions. In contrast, we found that H3K9me2 and H3K9me3 were highly depleted  
302 in the gene TSS region (Fig. S11A). As expected, H3K9 and H3K27 acetylation marks were  
303 depleted in TEs, while H3K9 di- and tri-methylation marks showed enrichment (Fig. S11B).  
304 In addition, enrichment analysis of simple repeats showed similar profiles with TEs in both

305 acetylation and methylation histone marks, although simple repeats tend to be highly enriched  
306 in H3K9me2 at a narrow set of genomic loci (Fig. S12). These results showed that our ChIP-  
307 seq profiles of histone modifications were largely consistent with the previous report on rice  
308 ChIP-seq analysis (41).

309 The observed low enrichment of H3K9ac in *9-12b*<sup>-/-</sup> mutant is a probable indication of  
310 mutation on *HAC701* gene (Fig. S11A). Therefore, we further analyzed the significantly  
311 enriched or depleted regions in *9-12b*<sup>-/-</sup> by taking the enrichment ratio of 9-WT over *9-12b*<sup>-/-</sup>  
312 (wild type/*hac701*) in H3K9ac, H3K27ac, H3K9me2, and H3K9me3 modifications. These  
313 analyses yielded 265 peaks in the H3K9ac fraction (Fig. 4A; Table S14). From the metaplot  
314 analysis, it showed that *9-12b*<sup>-/-</sup> has depleted H3K9ac enrichment in the 265 regions identified  
315 containing putatively 263 genes (Fig. 4A; Table S15), which include *HAC704* and *HAC701*  
316 loci and a mediator gene, *MED11* (Fig. 4D; Fig. S13A). These 265 regions were not associated  
317 with changes in other modifications in *9-12b*<sup>-/-</sup> mutant when compared to 9-WT (Fig. 4B).  
318 These results suggest that *HAC701* acetyltransferase may have a specificity to H3K9 site. It  
319 also suggests that *HAC701* probably autoacetylates its own promoter including another  
320 member of CBP family, *HAC704*.

321 We then analyzed the GO enrichment features of the putative 263 genes found in these  
322 265 regions with H3K9ac changes (Fig. 4C; Table S15). The results indicate that these genes  
323 function in processes involved in the flow of genetic information, DNA methylation in the  
324 CHH-context, circadian rhythm, organellar transport, cell cycle and reproduction,  
325 ubiquitination, and in a number of biosynthetic processes. It is also perhaps not surprising that  
326 histone acetylation was also enriched. In addition, enrichment of genes involving  
327 environmental responses included heat stress and innate immunity were observed, in which  
328 about 9% (23/263) were possibly involved in defense responses. A large fraction of these  
329 defense genes were identified as candidate sensors or decoys (e.g. Cyclin A1, Thioredoxin,

330 Jacalin-like lectin, *etc.*) that may act as negative regulators of rice effector-triggered immunity  
331 (ETI-immunity) (42) (Fig. 4E; Fig. S13B). The distribution of these 265 regions in H3K9ac  
332 ChIP revealed that a large portion were found in genes (73.58%) followed by promoters  
333 (18.11%) (Fig. S14). It is also interesting to note that H3K9ac in these identified regions was  
334 found in transposable elements (7.55%). Overall, these results demonstrate that HAC701-  
335 dependent acetylation of H3K9 histone site might modulate transcription of decoy genes that  
336 are monitored by R proteins in rice immunity. Additionally, H3K9ac assessed in different  
337 regions of the rice genome showed that it is found mostly in genes and promoters with high  
338 similarity in the previous study (41).

339 We proceeded by analyzing the general distribution of H3K9ac, H3K27ac, H3K9me2,  
340 and H3K9me3 peaks in intergenic and intragenic regions of rice genome in 9-WT and 9-12b<sup>-/-</sup>  
341 mutant (Fig. 5A). A large proportion of H3K9ac and H3K27ac were concentrated on exonic  
342 and intronic regions of the gene, while *HAC701* mutation resulted in the increase of enrichment  
343 of H3K27ac genome-wide on all regions of the rice genome (Fig. 5A). It is also worth  
344 mentioning that loss of *HAC701* increased the level of enrichment of these methylation  
345 modifications in intergenic regions. These data suggest that the loss of *HAC701* leads to an  
346 increase of a counter acetylation modification, H3K27ac, on a genome-wide scale.

347 To explain the disease resistance phenotype of *hac701* through WRK45-dependent  
348 immune pathway, we investigated the genomic locus of rice *WRKY45* (Fig. 5B). The  
349 upregulation of WRKY45 was accompanied by H3K9ac enrichment along the 1kb upstream  
350 region of *WRKY45* gene in 9-12b<sup>-/-</sup> (Fig. 5B, C). As the CRE motif was specifically enriched  
351 in the promoter region of *WRKY45* (Fig. S9C), we compared the enrichment of H3K9ac and  
352 H3K27ac in 9-12b<sup>-/-</sup> *WRKY45* promoter. We found that H3K9ac, but not H3K27ac, was highly  
353 enriched in this regulatory region (Fig. S15), while H3K27ac of *WRKY45* gene body was less  
354 pronounced than H3K9ac. Overall, our ChIP-seq data are consistent with RNA-seq data in

355 showing that mutation in *HAC701* gene potentiated *WRKY45* locus by regulating the  
356 enrichments of histone acetylation and methylation modifications on *WRKY45* promoter. We  
357 also found that the CRE motif of *WRKY45* is modulated by H3K9ac and perhaps other  
358 modifications, including those that are analyzed here.

359 **Systemic gene expression in rice-*Pso* pathosystem.** To explore the nature of systemic gene  
360 expression in rice-*Pso* pathosystem, we performed RNA-sequencing on systemic or distal  
361 tissues of 9-WT and *hac701*. The tissue samples were collected together with infected samples  
362 (local samples) 72 hours after *Pso* infection without further bacterial treatment. Genome-wide  
363 transcriptome analysis in systemic 9-WT samples showed that 24 genes were differentially  
364 expressed, and among them were eight genes that were common to both local and systemic  
365 tissues (Fig. S16A; Table S16). Comparative analysis also showed that although there were  
366 substantial expression changes in systemic tissues, the number of DEGs was highly reduced in  
367 systemic tissues than in local tissues. Among the eight DEGs, five of them showed altered  
368 transcriptional expression from local to systemic tissues (Fig. S16B). These genes were  
369 mannose-specific jacalin-related lectin/*OsJAC1* (Os12g0247700) (43), putative cytochrome  
370 P450 (Os09g0275400) (44), ATPase (Os07g0187400), GDP-L-galactose phosphorylase  
371 (Os12g0190000) (45), and terpene synthase (Os04g0344100), some with putative functions in  
372 response to pathogen infection or stress. These results indicate that these genes were mostly  
373 activated locally in the infection site and that any altered expression in distal tissues may  
374 facilitate systemic form of resistance. To compare the effect of *HAC701* mutation on the  
375 number of DEGs, we analyzed the MA-plots of systemic tissues of 9-WT and *hac701*. Our  
376 results showed that the number of DEGs with significant expression (*i.e.* those that are in red)  
377 was diminished in the mutant background implicating a possible role of *HAC701* in systemic  
378 signaling in rice-*Pso* pathosystem (Fig. S17). Overall, these results indicate that systemic  
379 tissues in *Pso*-challenged 9-WT plants have augmented transcriptional gene expression that

380 possibly aims to potentiate distal tissues on the onset of secondary pathogen attack. This also  
381 indicates that *HAC701* might potentially regulate systemic defenses through an unknown  
382 mechanism at distal non-infected site in preparation for future infection episodes.

383

## 384 **DISCUSSION**

385 Histone acetyltransferases or HATs and their complexes are involved in various biological  
386 processes in the cell. Currently, studies have been focused on the roles of HATs specifically  
387 members of the CREB-binding protein (CBP) family in regulating substrate specificity and  
388 enzymatic activity such as acetylation (40). However, its involvement in molecular signaling  
389 pathway leading to modulation of plant immunity remains to be explored. Therefore, it is  
390 expected that the analysis of plant CBP will facilitate a broader understanding of regulation of  
391 gene expression and protein function in plant immunity pathways.

392 In this study, we generated CRISPR/Cas9 mutants of the rice *HAC701* gene, a member  
393 of the CBP family of HATs, since our results indicated its involvement in rice immunity. By  
394 inoculating a rice compatible bacterial pathogen, *Pseudomonas syringae* pv. *oryzae* (*Pso*), we  
395 showed that *hac701* are resistant to *Pso* proliferation and also showed resistance tendency  
396 when infected with *Magnaporthe* (rice blast). These indicates that *HAC701* negatively  
397 regulates rice immunity responses to *Pso* and *Magnaporthe* pathogens. When we analyzed our  
398 transcriptome data, it showed that this negative regulation of immunity by *HAC701* is  
399 attributable to suppression of a major immunity pathway in rice probably through *WRKY45*.  
400 In *hac701*, *WRKY45* gene expression is upregulated and it seemed to be in a potentiated state  
401 enabling a further increase of expression upon bacterial infection. In addition, both  
402 morphological phenotypes and target genes in *hac701* mimic those in *WRKY45-ox* transgenic  
403 lines possibly indicating a genetic interaction of *HAC701* and *WRKY45* genes. Lastly, we  
404 showed in our ChIP-seq analysis that the promoter of *WRKY45* in *hac701* is enriched in



405 H3K9ac coinciding with a *cis* regulatory CRE motif that might be responsible for *WRKY45*  
406 upregulation and control.

407 In Arabidopsis, the p300/CBP acetyltransferase gene, *HAC1*, has been shown to  
408 positively regulate defense priming only in repetitively abiotic-stressed plants (46). *hac1-1* did  
409 not show any immunity related responses prior to abiotic stress applications indicating that  
410 Arabidopsis *HAC1* requires several abiotic stress stimulations to activate its immunity.  
411 However, this is not the case in *HAC701* in rice. We showed that the rice *HAC701* did not need  
412 abiotic stress stimulation to be transcribed and to effect pathogen and disease specific  
413 phenotypes (Fig. 1; Fig. S2; Fig. S3). Rather, our results are consistent with the disease  
414 phenotype exhibited by Arabidopsis mutant of GCN5, an acetyltransferase member of the  
415 SAGA transcriptional coactivator complex catalyzing the H3K14 modification site and at the  
416 same time influencing the acetylation of H3K9 (47). The *gcn5* showed upregulation of SA-  
417 mediated immunity resulting in resistance against *Pseudomonas syringae* pv. *tomato* infection.  
418 In our study, we found that WRKY45-dependent pathway confers resistance to *hac701*.  
419 Consistent with the view that the rice hormone defense network does not support a  
420 dichotomous role of salicylic acid (SA) and jasmonic acid/ethylene (JA/ET) phytohormones in  
421 regulating rice immunity (48), we found no evidence in this study that SA-mediated immunity  
422 played a central role in *hac701* resistance phenotype. However, we found JA-related  
423 differential gene expression as components of WRKY45-dependent defense-related genes  
424 (Fig. 3D). Indeed, JA biosynthesis is known as a downstream target of rice WRKY45 (49). In  
425 rice immunity model, both SA and JA/ET are considered effective in defense responses against  
426 (hemi) biotrophic and necrotrophic pathogens (48, 50, 51). While SA-mediated *AtNPR1*  
427 regulates majority, if not all, of Arabidopsis immune responses (52), *OsWRKY45* and  
428 *OsNPR1/NH1* are mostly independent of each other (34; Fig. S18). Although, our results  
429 suggest that *hac701* DEGs partially overlapped with NPR1/NH1-dependent pathways (Fig.

430 3B). Given that the rice system has a constitutive high levels of SA compared to most plants  
431 including *Arabidopsis* and tobacco, and pathogen applications did not increase its basal SA  
432 level (53, 54), our results are consistent with this report that SA in rice may not directly act on  
433 pathogens, rather, it may function to potentiate endogenous defense pathways in which  
434 *WRKY45* plays the central role. *OsWRKY45-ox* showed strong resistance against blast  
435 pathogen, even though lacking the constitutive expression of defense genes prior to blast  
436 infection (34). It could be that disruption of HAC701-dependent pathways through *HAC701*  
437 mutation led to activation of WRKY45-dependent pathways in an already SA-potentiated rice  
438 network, although this needs to be further examined in detail. Our results are also consistent  
439 with the disease phenotype presented by non-sense mutation in *Med15* gene, a subunit of  
440 Mediator complex (55). The *med15b.D* wheat mutants were resistant to stem rust, and the  
441 authors attribute a part of this to segmental coregulation in which a certain portion of the  
442 chromosome containing R genes (i.e. specifically NLR) was differentially expressed in wild  
443 type compared to mutant. While we did not observe any form of segmental coregulation in our  
444 analysis of *hac701*, we found that mutations in *HAC701* resulted in downregulation of ETI  
445 components notably the decoys/sensors (Fig. 4E).

446 *OsHAC701*, *AtHAC1*, *AtGCN5*, and *TaMed15*, play a central role in regulating the  
447 transcriptional machinery. They likely do this regulation by associating themselves and their  
448 complexes to RNA polymerase II and transcription factors as shown by their homologous  
449 counterparts in animals (4, 14, 56, 57). This is possible because they are multidomain genes  
450 that have the capacity to form and maintain large complexes. *OsHAC701*, *AtHAC1*, and  
451 *AtGCN5* are also involved in regulating abiotic stress responses suggesting that the complexity  
452 and specificity of their activities are dependent on their interacting factors that recruit them to  
453 the biological pathway itself (6, 7). Furthermore, majority of these genes, *OsHAC701*, *AtHAC1*,

454 and *TaMed15*, encode the KIX domain, a docking site for transcription factors reported to be  
455 involved in plant immunity (58).

456 In line with the above results, we propose that HAC701 is a negative regulator of  
457 WRKY45-dependent defense pathway in rice (Fig. S18). We suggest here two possible  
458 mechanistic insights into HAC701 regulation of WRKY45 that need further experimental  
459 evidence. First, similar to Med15, the HAC701-mediated immunity may require a loss or  
460 truncation of HAC701 in regulating the transcription of *WRKY45* locus. Given that the promoter  
461 of *WRKY45* contains a rare CRE motif (Fig. S9), we assume that an unidentified CREB-like  
462 transcription factor with regulatory potential is interacting with HAC701 through its KIX  
463 domain (Fig. S8) and with the CRE motif of *WRKY45* promoter. This interaction may also  
464 include other protein interactors specific to *WRKY45* locus regulation. From our results,  
465 mutation of *HAC701* is enough to potentiate *WRKY45* and further addition of *Pso* enables  
466 *hac701* to mount higher *WRKY45* expression compared to 9-WT. These suggest to us that  
467 *WRKY45* locus is poised for activation as suggested by our ChIP-seq analysis of untreated  
468 *hac701* (Fig. 5). However, the H3K9 acetylation we observed in *WRKY45* promoter might not  
469 be catalyzed by HAC701 itself in *hac701*, but may come from other CBP family members (Fig.  
470 1A; Fig. S1H) or other HATs. Although, we do not have ChIP-seq data for pathogen inoculated  
471 *hac701*, our RNA-seq data suggest that the poised *WRKY45* through *HAC701* mutation is  
472 enough to activate downstream defense likely through *WRKY45*-dependent signaling. Second,  
473 the decoys/sensors component that we found may act as negative regulators as predicted by the  
474 Decoy model (Fig. 4E) (42, 59). It could be that HAC701 maintains the acetylation of these  
475 decoys/sensors to equilibrium. Any disturbance in their expression could possibly lead to  
476 activation of R genes monitoring these decoys/sensors, which could in effect activate  
477 WRKY45-dependent immunity. Indeed, we found seven R genes upregulated in *HAC701*  
478 mutation treated with *Pso* (Table S17). It is of course possible that these two mechanisms are

479 occurring simultaneously in conferring resistance, although finer details of these proposed  
480 mechanisms are still unknown.

481 As HAC701 is a global transcriptional regulator, we found that it regulates a myriad  
482 number of biological processes underscoring its importance in genome and epigenome control  
483 (Fig. 4C). Among the enriched GOs, we found histone acetylation and innate immune  
484 responses were affected in *hac701*. These suggest to us the intricate network in HAC701-  
485 dependent regulation of immunity through its scaffolding and catalytic activity in the cell. It is  
486 possible that any misregulation in *hac701* could lead to genome-wide functional compensation  
487 events by activating other proteins acting on the same pathway as HAC701. This compensation  
488 functionality has been shown in a PHD-finger protein, Enhanced Downy Mildew 2 (EDM2),  
489 in NLR (i.e. a type of R protein) protein expression control as it affects plant fitness (60).  
490 Therefore, it is also likely that the expression regulation of *WRKY45* locus as well as the  
491 decoys/sensors may be subjected to compensatory regulation in the case of *HAC701* mutation.

492 The heterochromatic marker, H3K9me3, is common in animals, but rarely found in  
493 Arabidopsis and in plants in general (61). Indeed, our analysis did not find the peaks in 9-WT  
494 ChIP-seq, although we found 33 peaks in the *HAC701* mutant (Table S14). Most H3K9me3  
495 enrichments were found in intergenic regions and in only two genes with intragenic  
496 enrichments. Table S18 also shows genes nearest the H3K9me3 enrichment in the intergenic  
497 regions. These results suggest that H3K9me3 is maybe a rare modification and is possibly  
498 modulated by HAC701 presence and activity in certain genomic regions.

499 Trade-off between growth and defense in plants is a common occurrence and often  
500 considered inevitable (62, 63). However, we were surprised to find that *hac701* in the T2 up  
501 until T4 generations do not have readily visible penalties in height, tiller number, number of  
502 effective grains, and grain weight (Fig. S1D-I). Previous studies showed that *WRKY45-ox* had

503 no obvious autoimmunity phenotype, although there was a slight decrease in height observed  
504 as compared to wild type in response to growth conditions (33, 34). In this study, *WRKY45*-  
505 dependent resistance against *Pso* was observed in *hac701* (Fig. 1C, Fig. S3). Furthermore, these  
506 *HAC701* mutants also showed resistant tendencies against *Magnaporthe* infection (Fig. 1D).  
507 *WRKY45-ox* treated with *Magnaporthe* showed resistance, while a BTH-induction in  
508 knockdown *WRKY45* mutants did not rescue the *Magnaporthe* resistance and remained  
509 susceptible (34). Together these suggest that morphological and disease phenotypes of *hac701*  
510 resembled that of *WRKY45-ox* indicating that *HAC701* mutation indeed upregulates *WRKY45*  
511 gene that prompts *WRKY45*-dependent defense pathway into action leading to resistance  
512 against bacterial and fungal pathogens. It could be that the potentiated state of *WRKY45* in  
513 *hac701* has modulated the expression of resistance from affecting these agronomic traits.  
514 Nonetheless, the mechanistic basis for this trade-off, if it truly exists, is not well understood  
515 and needs further investigation.

516 We would like to emphasize that at the moment we do not have strong evidence that  
517 *HAC701* specifically catalyzes H3K9 acetylation. Although, the H3K9ac antibody used in this  
518 study detected H3K9ac decrease of numerous loci in *hac701* compared to 9-WT that are not  
519 present in H3K27ac, histone target-specificity of *HAC701* still needs to be verified. As  
520 H3K9ac and H3K14ac were seemed co-regulated and were directly correlated to each other in  
521 regulating their common target genes (47), we assume that the H3K14ac in our *hac701* would  
522 show the same correlation as well.

523 *HAC701* appears to be an ancient protein in the CBP histone acetyltransferase family  
524 clade (Fig. 1A). The fact that *HAC701* mutation is not lethal, suggests that other CBP members  
525 and arguably members of other histone acetyltransferase families might have redundant  
526 functions at some regulatory level. However, our results showing that *hac701* has enhanced  
527 disease resistance phenotype and reduction in acetylation demonstrate certain functional

528 specificities through HAC701-dependent pathways. Also, the fact that *hac701* showed  
529 reduction in expressed genes at the systemic level (Fig. S17), indicates possible broader roles  
530 of HAC701 other than localized modulation of rice innate immunity.

531

## 532 **MATERIALS AND METHODS**

533 **Biological samples and plant growth conditions.** *Oryza sativa* ssp. *japonica* cv. Nipponbare  
534 (wild type) plants and mutant lines were grown in commercial soil (Kumiai, JA Okinawa) at  
535 30°C day/25°C night temperatures under a 12-h-light/12-h-dark photoperiod in an incubator  
536 (BiOTRON, NK System). The lighting was supplied by white light at an intensity of 31,000  
537 lx. Relative humidity was at 70%. For embryonic rescue, rice embryos were extracted from  
538 wild-type immature seeds 10-14 days after flowering. Embryos were grown into plantlets in  
539 Murashige and Skoog (MS) agar medium before being transferred to soil for further growth.

540 **Isolation and screening of *HAC701* mutant lines.** To generate *HAC701* CRISPR/Cas9  
541 knockout mutant lines, two sgRNA *HAC701*-specific target sites were obtained from CRISPR-  
542 P website and were used to synthesize primers for pRGEB31 (stable system) (64) (Table S1).  
543 Briefly, the vectors were digested with BSA I, while primers were phosphorylated and  
544 annealed to produce a DNA oligo duplex. The digested vectors were ligated to DNA oligo  
545 duplex using T4 ligase. CRISPR/Cas9 vectors were introduced into *Agrobacterium* EHA105  
546 and rice calli were transformed using the standard *Agrobacterium*-mediated transformation  
547 procedure. For CRISPR/Cas9 T0 and T1 screening, leaf samples were collected and genomic  
548 DNA was extracted using a standard CTAB protocol. Then, PCR-RFLP assay utilizing BseLI  
549 restriction enzyme (Thermo Fisher Scientific) was used to detect the CRISPR/Cas9-engineered  
550 mutations on *HAC701* targets (Table S1). Positive lines detected by PCR-RFLP assay were  
551 further analyzed by sequencing for INDEL mutations using S2 and S5 forward primers (Table

552 S1). Four DNA amplicons per line were cloned and sequenced to determine the zygosity of the  
553 lines. Biallelic mutations were found in a few T0 and T1 lines. First exon (Target 1) was  
554 initially targeted in *HAC701* gene using a CRISPR/Cas9 vector construct containing a single-  
555 guided RNA (S2) (Fig. S1A; Table S1). The isolation of the first generation (T0) *CRISPR*  
556 *Cas9-HAC701-S2* lines yielded 90 positive independent lines, and among these, randomly  
557 chosen representative lines were further genotyped to characterize the identified DNA  
558 mutation. PCR and RFLP assays resulted in the isolation of monoallelic lines characterized  
559 mostly by deletions and a few insertions (INDELS) on or surrounding the targeted site of  
560 sgRNA (S2) (Fig. S1B-C; Table S1). The T1 *HAC701-S2* generation as observed from seeds  
561 showed conservation of mutation directly from parental lines (Fig. S1B). Then, mutant lines  
562 were isolated using the same technology targeting the fifth exon (Target 2) of the *HAC701*  
563 gene using a construct that also contains a single guide RNA (S5) (Fig. S1D; Table S1). The  
564 *CRISPR-Cas9-HAC701-S5* (T0) lines generated 11 positive independent lines of which three  
565 were genotyped for verification of mutations (Fig. S1E). Second generation (T1) lines also  
566 showed conservation of mutations (Fig. S1E). Similar to *HAC701-S2* lines, genotyping showed  
567 INDELS in proximity to or on the target site.

568 **Phenotyping.** Positive lines containing biallelic homozygous mutations were phenotyped for  
569 effective grain production by examining and counting the mature grains produced in each  
570 panicle. Tiller number was counted one month after flowering. Chlorosis phenotype was used  
571 as a proxy for any defect in photosynthesis and or apparatus. 1000-grain weight was measured  
572 on seeds oven dried for 30-days at 37°C. Comparison of height and general morphological  
573 structures were documented using photography.

574 **flg22 leaf disc assay.** flg22 peptide, a well-known inducer of plant innate immunity,  
575 specifically of PTI was used to test which rice HATs respond to flg22 treatment. Leaf disc  
576 assay (modified from 65, 66) was performed on fully expanded 30-d-old wild-type leaf samples

577 and treated with synthetic flg22 peptide (30-51 aa, Flic, *Pseudomonas aeruginosa*) (ADI, Inc.)  
578 at different time periods and concentrations. Briefly, leaves were cut into about 5 mm sizes and  
579 floated on the water for 24-h in growth chamber to remove the symptoms of wounding stress.  
580 Leaves were then treated with PAMP solution in water at 15 ml falcon tubes with rotation  
581 (Corning Science). After treatment, paper towel-dried leaves were frozen in liquid nitrogen.

582 **Pathogenesis assay.** Seeds were surface sterilized and imbibed in sterile water in the dark for  
583 72 h before sowing on MS basal medium (Sigma Life Science). After 10 days, the plantlets  
584 were transferred to soil and were grown for another 18 days until infection. *Pseudomonas*  
585 *syringae* pv. *oryzae* (*Pso*) (MAFF No. 301530, NIAS Genebank) was grown in Luria-Bertani  
586 (LB) broth (Sigma-Aldrich) at 28°C until OD = 0.2 and was resuspended in 10 mM MgCl<sub>2</sub>.  
587 The fourth leaf counting from the first true leaf was infected with *Pso* using needleless syringe  
588 injected from the lower surface of the leaf. *Pso* leaf infiltration was performed 10 cm from the  
589 tip of the leaf and was done 3x with approximately 1 cm space between the infiltration sites.  
590 Infected plants were temporarily maintained outside the growth chamber for 2 h to allow drying  
591 of the infected sites before returning to the chamber. Infected leaf samples were collected 3  
592 days after *Pso* inoculation utilizing only the tissues comprising the spaces between the  
593 infiltration sites. These tissues were grounded in sterile 10 mM MgCl<sub>2</sub> and the grounded tissue  
594 suspensions were transferred to LB agar medium for incubation. The infected local tissues  
595 were assayed with minor modifications as detailed in Liu, *et al.* (67). For log cfu per leaf disc  
596 measurement, the grounded tissue suspensions were serially diluted six times to be able to  
597 count with accuracy the *Pso* colonies on Luria-Bertani (LB) agar medium. *Pso* colonies were  
598 counted from 4<sup>th</sup> until 6<sup>th</sup> serial dilution in several independent and genotypically dissimilar  
599 *hac701* lines, *9-5<sup>-/-</sup>*, *9-12a<sup>-/-</sup>*, and *9-12b<sup>-/-</sup>*. The remaining samples of the fourth leaf were used  
600 for RNA-sequencing analysis. For blast assay, the fifth leaf of 25-day-old plants were used for  
601 infection of *Magnaporthe oryzae* (MAFF No. 101511, NIAS Genebank). Blast spores were



602 incubated 10 cm from the tip of the leaf (1<sup>st</sup> site) and at another site of the same leaf 10 cm  
603 from the first site (2<sup>nd</sup> site). Infected plants were incubated for 10 days inside an incubator  
604 (BiOTRON, NK System) and the length of blast infection was measured.

605 **Gene expression analysis.** Total RNA extraction was performed using RNeasy Plant Mini Kit  
606 (Qiagen) or Maxwell<sup>®</sup> 16 LEV Plant RNA Kit (Promega). cDNA was synthesized using  
607 Primescript II 1<sup>st</sup> Strand cDNA Synthesis Kit (Takara) according to manufacturer's  
608 instructions. RT-qPCR assays were performed on three biologically independent samples or  
609 as indicated. RT-qPCR was performed using SYBR Premix Ex Taq II (Tli RNaseH Plus)  
610 (Takara) and was calculated following Pfaffl (68) by averaging the values relative to *ACT1*  
611 control gene. Primer sequences are listed in Table S19.

612 **RNA-sequencing.** Total RNA was isolated from mock- and *Pseudomonas syringae* pv. *oryzae*  
613 (*Pso*)-treated 9-WT wild type and *hac701* with Maxwell 16 LEV Plant RNA Kit (Promega)  
614 run on the Maxwell 16 Instrument (Promega) and/or mirVana miRNA Isolation Kit (Invitrogen  
615 by Thermo Fisher Scientific). The *hac701* lines, *9-5<sup>-/-</sup>* and *9-12b<sup>-/-</sup>*, were lumped together as  
616 two independent biological samples during analysis. To remove the contaminating genomic  
617 DNA from RNA samples isolated using the mirVana miRNA Isolation Kit, RNA was treated  
618 with DNase I (RNA free) (Nippon Gene) following the manufacturer's instructions. Samples  
619 were submitted to OIST Sequencing Center for RNA quality checking, library preparation, and  
620 paired-end mRNA-sequencing (PE mRNA-seq).

#### 621 **Chromatin immunoprecipitation-sequencing.**

622 ChIP analysis of histone modifications in wild type and mutants were performed as follows:  
623 One-month-old mature leaves of wild type (9-WT) and *hac701* (*9-12b<sup>-/-</sup>*) were fixed in a  
624 fixation buffer (10mM Tris-HCl (pH 7.5), 50 mM NaCl, 0.1 M sucrose, 1 % formaldehyde)  
625 for 10 min, followed by quenching with 125 mM Glycine for 5min. Nuclei isolation was

626 performed as previously described (69). Immuno-precipitation was performed for two  
627 replicates for each genotype (about 1 g tissue/IP) by SimpleChIP Plus Kit (Cell Signaling  
628 Technology) according to the manufacturer's instructions. Anti-Histone H3 antibody (Abcam  
629 ab1791), Anti-acetyl Histone H3K9 antibody (Merck ABE18), Anti-Dimethyl Histone H3K9  
630 antibody (Merck 05-1249), Anti-Trimethyl Histone H3K9 antibody (Merck 17-10242), Anti-  
631 acetyl Histone H3K27 antibody (Abcam ab4729) were used for IPs. Dynabeads M-280 Sheep  
632 Anti-Rabbit IgG (Invitrogen 11203D) or Anti-Mouse IgG (Invitrogen 11201D) was used for  
633 purification of chromatin-antibody complex. Precipitated DNA samples were sequenced by  
634 Hiseq 4000 in 150 bp paired-end mode in OIST Sequencing Center. For ChIP real-time PCR,  
635 we used the "Percent Input Method" (Thermo Fisher Scientific) with 33% input value to  
636 normalize the data for enrichment calculation. Three independent biological replicates were  
637 performed for each sample.

638 **Data analysis.** For RNA-sequencing analysis, high quality reads were trimmed in order to  
639 remove sequencing bias and adapter effects. Trimmed reads were then mapped to the *Oryza*  
640 *sativa* spp. *japonica* genome (Os-Nipponbare-Reference-IRGSP-1.0) using Tophat (70, 71).  
641 Custom R scripts were used to generate the RNA count table necessary to analyze the  
642 differentially expressed genes (DEGs). Differential expression analysis was performed using  
643 DESeq2 package (72). DEGs were selected at Benjamini-Hochberg adjusted  $p$  value of  $< 0.01$ .  
644 To perform Gene Ontology (GO) analysis, gene lists were submitted to Enrichment Analysis  
645 (73) web tool of the Gene Ontology Consortium (74-76). To create the Venn diagram, gene  
646 sets were submitted to InteractiVenn web tool using *unions by list* to obtain overlapping  
647 components of input datasets (77). For ChIP-sequencing analysis, raw reads were trimmed and  
648 were mapped to *Oryza sativa* spp. *japonica* genome (Os-Nipponbare-Reference-IRGSP-1.0)  
649 using Bowtie (78). Read alignments were visualized using Integrated Genome Browser (IGB)  
650 (79). ChIP-enriched peaks were called by deriving a quantitative reproducibility score called

651 “irreproducibility discovery rate” (IDR) (73). Comparative analyses and quantitation of  
652 enrichments between 9-WT and *hac701* (*9-12b*<sup>-/-</sup>) were analyzed using a suite of tools and  
653 utilities found in deepTools (80) and BEDTools (81). Peaks were positioned to genomic  
654 locations (intergenic, genes, transposable elements, simple repeats) and within genes  
655 (promoter, exon, intron, TSS, TTS). Table S14 showed the number of peaks identified for each  
656 histone modifications in 9-WT and *hac701* (*9-12b*<sup>-/-</sup>). Peak-to-gene assignment was performed  
657 using Homer (v4.11) (82). To create the phylogenetic tree of Arabidopsis and rice histone  
658 acetyltransferases, we used the UniProt amino acid sequences and reconstructed the  
659 phylogenetic relationships using Phylogeny.fr (83, 84). For KIX domain analysis, we used  
660 KIXBASE to perform multiple sequence alignment (38). To identify *cis*-elements on DNA  
661 sequences, we used cister prediction software that utilizes hidden Markov model (85). For  
662 motif analyses, we utilized the 1kb upstream promoter sequences of the sample genes. We used  
663 Discriminative Regular Expression Motif Elicitation (DREME) (86) to discover the  
664 significantly enriched motifs at a threshold of E-value<0.05 using shuffled input sequences as  
665 control. These enriched motifs were used as query sequences in Tomtom (MEME suite 5.2.0)  
666 to find similar motifs in published libraries. Libraries used were Eukaryotic DNA and  
667 Vertebrates (*in vivo* and *in silico*).

668 **Data visualization.** Visualization of majority of the data was performed using Microsoft Excel  
669 for Mac 2011 (version 14.7.1) and R packages: *heatmaply*, functions from *gplots*, and *ggplot2*.

670 **Data Repository.** For RNA-sequencing and ChIP-sequencing, raw data have been deposited  
671 in the DDBJ Sequence Read Archive under accession ID (pending upon submission of data).  
672 All other data can be found in the Supplemental Tables 1-19 in this manuscript.

673

674

675 **FIGURE LEGENDS**

676 **Figure 1** Disease phenotype of biallelic homozygous CRISPR/Cas9 lines targeting the fifth  
677 exon of rice acetyltransferase gene, *HAC701*. (A) Phylogenetic relationships of members of  
678 Arabidopsis and rice histone acetyltransferases. The numbers in red are branch support values.  
679 All amino acid sequences are from UniProt database. (B) Upper panel: Alleles from four lines  
680 of the second generation (T1) plants were identified by cloning and sequencing the PCR  
681 products from *HAC701* target region using the primers found in Table S1. Lower panel: PCR  
682 and RFLP assays of representative T1 generation lines. The mutant line *9-12a<sup>-/-</sup>* displaying a  
683 wild type-like band was due to unaltered sequence order recognized by BseLI even after an  
684 insertion event, however we confirmed by sequencing that an insertion mutation was present  
685 in this line. (C) *Pseudomonas syringae* pv. *oryzae* (*Pso*) infection assay of *hac701*, *9-12b<sup>-/-</sup>* and  
686 *9-5<sup>-/-</sup>* (T2), using *9-5<sup>+/+</sup>* segregated wild type line (9-WT) as control. Bacterial density  
687 quantification uses values from 4<sup>th</sup>-6<sup>th</sup> serial dilutions. The mutant line *9-12b<sup>-/-</sup>* was grown from  
688 the seeds of the third generation (T2), while *9-5<sup>-/-</sup>* line was embryonically rescued about 15  
689 days post flowering from the second generation (T1) parental plants. All mock measurements  
690 yielded zero bacterial growth for both wild type and mutant lines. Bars represent the 95%  
691 confidence interval (CI) and compared to the wild type using two-tailed Student's *t*-test at  
692  $P < 0.05$  in *9-12b<sup>-/-</sup>*; one-tailed Student's *t*-test at  $P < 0.05$  in *9-5<sup>-/-</sup>*. (D) *Magnaporthe oryzae*  
693 infection assay of *hac701*, *9-12b<sup>-/-</sup>* and *9-5<sup>-/-</sup>*, using *9-5<sup>+/+</sup>* segregated wild type line (9-WT) as  
694 control. Lesion length was measured on leaves after 10 dpi (days post infection). White length  
695 indicator bar on the left panel is 10 mm. Bars on the right panel represent standard error (SE)  
696 and compared to the wild type using *F*-test for variance and Student's *t*-test.

697

698 **Figure 2** The rice *WRK45* gene expression is induced in *hac701* lines. (A) Overlap analysis of  
699 upregulated and downregulated genes in *hac701* background under mock and pathogen (*Pso*)-  
700 treatment conditions (Table S5, S6). *OsWRKY45* is the only differentially expressed gene in  
701 either the absence or presence of pathogen. Transcriptome data were normalized using mock  
702 data sets for each genotype and condition. (B) *OsWRKY45* expression when *HAC701* is  
703 mutated (+ sign). The addition of pathogen (+ sign) on *hac701* increased further the  
704 *OsWRKY45* expression. Transcriptome data of *hac701*, *9-12b<sup>-/-</sup>* and *9-5<sup>-/-</sup>*, under mock or *Pso*-  
705 treated conditions were lumped as two independent biological samples for analysis (See Table  
706 S2). hpi, hours after infection.

707

708 **Figure 3** *hac701* phenocopies *OsWRKY45* overexpression transgenic plants. (A) Overlap  
709 analysis of differentially expressed genes (DEGs) in *hac701* background with benzothiadiazole  
710 (BTH)-responsive genes (*i.e.* BTH is a salicylic acid analog) in wild type rice (Table S6, S7).  
711 Significance value of the overlap data was tested using the hypergeometric distribution test.  
712 (B) Overlap analysis of DEGs in *hac701* background with BTH-inducible and *OsWRKY45*-  
713 dependent or *OsNPRI/NHI*-dependent genes (Table S8, S10). Significance values of the  
714 overlap data were tested using the hypergeometric distribution test. (C) *OsWRKY45*-  
715 dependent defense pathway components. (D) Gene expression of *OsWRKY45*-dependent  
716 defense genes in 9-WT and *hac701*.

717

718 **Figure 4** Genome-wide H3K9 acetylation is depleted in *hac701*. (A) Heatmap showing the  
719 accumulation of H3K9 acetylation on 265 peaks by taking the enrichment ratio of 9-WT and  
720 *9-12b<sup>-/-</sup>* data (Wild type/mutant) (Table S15). (B) Heatmaps showing the accumulation of  
721 H3K27 acetylation, H3K9 di-methylation, and H3K9 tri-methylation on 265 peaks by taking

722 the same enrichment ratio as (A). Heatmaps in (A) and (B) are representatives of two  
723 biologically independent data showing similar enrichment results and number of peaks  
724 identified. (C) GO enrichment analysis showing only the “Biological Process” of the 263 genes  
725 found in the 265 peaks (Table S15). Numbers in enrichment indicate Fold Enrichment Value  
726 using Fisher’s Exact test with results for uncorrected  $P < 0.05$ . (D) Enrichment scores of seven  
727 representative genes showing depletion of H3K9 acetylation in *hac701*, *9-12b*<sup>-/-</sup>. (E)  
728 Enrichment scores of 10 representative putative decoy/sensor genes (42) showing depletion of  
729 H3K9 acetylation in *hac701*, *9-12b*<sup>-/-</sup>. Scores in (D) and (E) are averages of two biologically  
730 independent ChIP-seq replicates with bars showing standard deviation (SD).

731

732 **Figure 5** *OsWRKY45* loci is enriched in H3K9 acetylation in *hac701*. (A) Enriched peaks on  
733 histone modifications positioned to genomic locations (Intergenic, Promoter-TSS, Exon,  
734 Intron, and TTS) in 9-WT and *hac701*, *9-12b*<sup>-/-</sup>. All data were normalized to input. (B)  
735 *OsWRKY45* depth graph of RNA-seq and H3K9 acetylation ChIP-seq showing the number of  
736 reads in RPKM (Reads Per Kilobase of transcript, per Million mapped reads) in 9-WT and  
737 *hac701*, *9-12b*<sup>-/-</sup>. The red dotted box shows the 1kb upstream region of *OsWRKY45* with arrow  
738 indicating the direction of transcription. (C) Upper panel: Gene map of *OsWRKY45* with arrow  
739 showing the direction of transcription, gray bars are 5’ and 3’ untranslated regions (UTRs),  
740 black bars are exons, and white bars are introns. Lower panel: 9-WT and *hac701* (*9-12b*<sup>-/-</sup>)  
741 mutant ChIP-qPCR showing enrichments of H3K9 acetylation and H3K9 di-methylation in  
742 *OsWRKY45* locus. The significant difference in enrichment is computed using two-tailed  
743 Student's *t*-test where asterisks: \*\*\* $P < 0.01$ , \*\* $P < 0.05$ , and NS means Not Significant.

744

745

746 **TABLE LEGENDS**

747 None

748

749 **SUPPLEMENTARY FIGURE LEGENDS**

750 **Figure S1** Characterization of mutations generated by CRISPR/Cas9 editing on the first and  
751 fifth exon of rice acetyltransferase gene, *HAC701*. (A) Schematic showing an sgRNA targeted  
752 to the first exon of *HAC701* gene. (B) PCR and RFLP assays of representative T0 and T1  
753 generation lines from leaf blade (Lb), panicle (Pa), and seed (S) DNA samples. +/+ and M  
754 represent the zygosity of the line, where +/+ refers to wild type and M refers to monoallelic.  
755 (C) Alleles from 12 T0 generation lines identified by cloning and sequencing the PCR products  
756 from *HAC701* target regions using the primers found in Table S1. Similar line number indicates  
757 that lines came from the same callus. For each line, four DNA amplicons were cloned and  
758 sequenced and the fraction indicates the number of times the type of mutations were found in  
759 each line. In case not indicated, it means wild type. The asterisk (\*) indicates the most common  
760 mutation found within and across different lines. (D) Upper panel: Schematic showing an  
761 sgRNA targeted to the fifth exon of *HAC701*. Lower panel: Schematic showing the protein  
762 domains of *HAC701*. (E) PCR and RFLP assays of representative T0 and T1 generation lines  
763 from leaf blade DNA samples. M, B represent the zygosity of the line, where M refers to  
764 monoallelic, and B refers to biallelic. T1 lines came from parental 2-3 line. (F) Phenotype of  
765 T2 lines showing effective grains and tiller number. (G) Images of T3 *hac701* lines compared  
766 to segregated wild type, 9-WT. (H) RT-qPCR levels of *HAC703* and *HAC704* genes in  
767 *HAC701* mutation line background. Samples were treated hydroponically with HDAC  
768 inhibitors (1 $\mu$ M Trichostatin A (TSA) and 100  $\mu$ M Nicotinamide at final concentration) for  
769 three days. Bars represent standard error (SE); n= 3. The significant difference in transcription  
770 is computed using two-tailed Student's *t*-test where asterisks: \**P*<0.01. (I) Phenotype of T3  
771 and T4 lines showing grain weight.

772 **Figure S2** flg22 induced the expression of rice pathogenesis-related and histone  
773 acetyltransferase (HAT) gene, *HAC701*. Transcriptional levels of pathogenesis-related gene,  
774 *PRI0a*, and of eight HAT genes upon flg22 induction at concentrations in  $\mu\text{M}$  units. Data  
775 shown are means  $\pm$  SE;  $n=3$ . The significant difference in transcription is computed using two-  
776 tailed Student's *t*-test where asterisks: \*\*\* $P\leq 0.01$ , \*\* $P\leq 0.03$ , \*  $P\leq 0.05$ .

777

778 **Figure S3** *Pseudomonas syringae* pv. *oryzae* (*Pso*) infection assay in T2 *hac701* line, *9-12a*<sup>-/-</sup>  
779 . Values from 4<sup>th</sup>-6<sup>th</sup> serial dilutions were used for quantification. Segregated wild type line  
780 was used as a control. Bars represent the 95% confidence interval (CI) and compared to wild  
781 type using one-tailed Student's *t*-test at  $P<0.05$ .

782

783 **Figure S4** Sample distances of RNA-seq data after regularized-logarithm transformation  
784 (rlog). Heatmap showing the Euclidean sample distance matrix of mock- and *Pseudomonas*  
785 *syringae* pv. *oryzae* (*Pso*)-treated samples in two biologically independent replicates.

786

787 **Figure S5** Top 10 genes that are most highly variable in mock- and *Pso*-treated RNA-seq  
788 samples. Gene descriptions were derived from Oryzabase: Integrated Rice Science Database  
789 (NBRP) and Rice Genome Annotation Project (NSF). Two biologically independent RNA-seq  
790 replicates are presented.

791

792 **Figure S6** Rice-*Pseudomonas syringae* pv. *oryzae* (*Pso*) pathosystem. (A) Enriched pathways  
793 in the rice-*Pso* pathosystem. (B) Pie chart of the number of up- and down-regulated genes in  
794 9-WT control 72h post *Pso* infection (Table S3). Two biologically independent RNA-seq data



795 in mock and *Pso* treatments are presented where differentially expressed genes (DEGs) were  
796 selected at *P* adjusted value < 0.01.

797

798 **Figure S7** Features of differentially expressed genes (DEGs) in *Pseudomonas syringae* pv.  
799 *oryzae* (*Pso*)-treated 9-WT and *hac701* transcriptomes. Overlap and GO-analysis of  
800 upregulated (*A*) and downregulated (*B*) genes in *hac701* under *Pso* treatment (Table S3, S4).  
801 Transcriptome data were normalized using mock data sets for each genotype. GO enrichment  
802 analysis showing only the “Biological Process” of upregulated *HAC701*-repressed genes (141)  
803 and *HAC701*-independent genes (336), downregulated *HAC701*-enhanced genes (31) and  
804 *HAC701*-independent genes (46). Fold Enrichment Value uses Fisher’s Exact test with results  
805 for uncorrected  $P < 0.05$ .

806

807 **Figure S8** Alignment of KIX domain found in different organisms. KIX domain in *HAC701*  
808 (*A*) and *HAC703* (*B*) proteins. Sc: *Saccharomyces cerevisiae*, Os: *Oryza sativa*, Hs: *Homo*  
809 *sapiens*, Ce: *Caenorhabditis elegans*, Dm: *Drosophila melanogaster*, Mm: *Mus musculus*.

810

811 **Figure S9** *OsWRKY45* promoter contains a rare CRE motif. (*A*) A CRE motif (upper panel)  
812 matches significantly to the query motif CGRCGRCG (lower panel). The query motif was  
813 derived from discovered motifs (Table S13) in the 1 kb promoter regions of differentially  
814 expressed genes (DEGs) in *hac701* treated with *Pso*. (*B*) 5 genes out of 660 differentially  
815 expressed genes (DEGs) (0.76%) (Table S6) in the *hac701* contain the full CRE motif. Cister  
816 parameter settings: default settings were used. (*C*) CRE motif cluster found in 1kb upstream  
817 sequences of *OsWRKY45* start site. The red line indicates the probability of transcription factors  
818 binding to these CRE motif sites. CRE motif is found most probably on the direct strand (+).

819 **Figure S10** Enrichment strength of ChIP signals in 9-WT input and histone modifications.

820

821 **Figure S11** Heatmaps of genome-wide histone modification enrichments in genes and  
822 transposable elements (TEs) of rice 9-WT and *hac701* (*9-12b*<sup>-/-</sup>) mutant. Enrichment of H3K9  
823 acetylation, H3K9 di-methylation, H3K9 tri-methylation, H3K27 acetylation, and H3 in genes  
824 (A) and TE (B) regions. Data represent one of the two biologically independent samples  
825 showing similar enrichment results.

826 **Figure S12** Heatmaps of genome-wide histone modification enrichments in simple repeats of  
827 rice 9-WT and *hac701* (*9-12b*<sup>-/-</sup>) mutant. Enrichment of H3K9 acetylation, H3K9 di-  
828 methylation, H3K9 tri-methylation, H3K27 acetylation, and H3 in simple repeat regions. Data  
829 represent one of the two biologically independent samples showing similar enrichment results.

830

831 **Figure S13** Enrichment scores of additional representative genes showing differential  
832 enrichments of H3K9 acetylation in *hac701* (*9-12b*<sup>-/-</sup>) mutant. (A) Transcriptional coactivator  
833 genes showing reduced or partially reduced H3K9 acetylation enrichments. (B) Putative  
834 guardee genes showing differential enrichments of H3K9 acetylation. Scores are averages of  
835 two biologically independent ChIP-seq replicates with bars showing standard deviation (SD).

836

837 **Figure S14** Distribution on genomic locations of 265 regions in H3K9 acetylation ChIP (wild  
838 type/mutant).

839

840 **Figure S15** *OsWRKY45* depth graph of H3K9 and H3K27 acetylation ChIP-seq showing the  
841 number of reads in RPKM (Reads Per Kilobase of transcript, per Million mapped reads) in 9-

842 WT and *hac701* (*9-12b*<sup>-/-</sup>) mutant. The red dotted box shows the 1 kb upstream region of  
843 *OsWRKY45* with arrow indicating the direction of transcription. Data show a representative  
844 sample.

845

846 **Figure S16** Systemic gene expression analysis in rice-*Pseudomonas syringae* pv. *oryzae* (*Pso*)  
847 pathosystem. (A) Differentially expressed genes (DEGs) in the local (870) and systemic (24)  
848 tissues of plants infected with *Pso* (Table S16). Eight DEGs were found to be common in both  
849 local and systemic tissues. (B) The expression of eight DEGs shown in log<sub>2</sub> fold changes. For  
850 local tissue analysis, two independent RNA-seq samples in both treatments (mock and *Pso*)  
851 are presented. For systemic tissue analysis, two independent RNA-seq samples in mock and  
852 three in *Pso* treatment are presented. The number of reads are in RPKM (Reads Per Kilobase  
853 of transcript, per Million mapped reads) in 9-WT and *hac701*.

854

855 **Figure S17** MA-plot of differentially expressed genes (DEGs) in systemic tissues of 9-WT and  
856 *hac701* infected with *Pseudomonas syringae* pv. *oryzae* (*Pso*). (A) and (B) plots showing  
857 differences in measurements of differentially expressed genes (DEGs). *P* adjusted value is set  
858 at <0.01. For 9-WT and *hac701* samples, two independent RNA-seq samples in mock treatment  
859 and three in *Pso* treatment are presented.

860

861 **Figure S18** *OsWRKY45*-dependent defense pathway is suppressed by *HAC701*. Defense-  
862 related genes regulated directly and indirectly by *OsWRKY45* are negatively regulated by  
863 *HAC701* resulting in resistance phenotype of *hac701* through *OsWRKY45* upregulation.

864

865

866 **SUPPLEMENTARY TABLE LEGENDS**

867 **Table S1** sgRNA oligonucleotides used for CRISPR/Cas9 mutagenesis and primers for  
868 genotyping. Bold sequences in the guide RNAs are the Protospacer Adjacent Motif (PAM).

869

870 **Table S2** Summary of total RNA-sequencing data in local tissues.

871

872 **Table S3** Wild type (9-WT) differentially expressed genes (DEGs) in *Pso*.

873

874 **Table S4** *HAC701* repressed and enhanced genes.

875

876 **Table S5** *HAC701* mutation differentially expressed genes (DEGs) in Mock (*HAC701mut*-  
877 DEGs in Mock).

878

879 **Table S6** *HAC701* mutation differentially expressed genes (DEGs) in *Pso* (*HAC701mut*-DEGs  
880 in *Pso*). The motifs were identified 1kb upstream sequence of the start codon.

881

882 **Table S7** BTH-responsive genes (24 hpi) in microarray experiments (34, 35) (Shimono et al.  
883 2007, The Plant Cell & Sugano et al. 2010, Plant Molecular Biology). Overlap genes were  
884 removed.

885

886 **Table S8** BTH-inducible & WRKY45-dependent genes (33) (Nakayama et al. 2013, BMC  
887 Plant Biology).

888

889 **Table S9** Upregulated genes after DEX-induced *WRKY45* expression (33) (Nakayama et al.  
890 2013, BMC Plant Biology).

891

892 **Table S10** BTH-inducible genes affected by rice *NPR1/NHI* knockdown (35) (Sugano et al.  
893 2010, Plant Molecular Biology).

894

895 **Table S11** *HAC701* mutation differentially expressed genes (DEGs) found in BTH-WRKY45  
896 regulated genes that contain W-box motifs. The motifs were identified 1 kb upstream sequence  
897 of the start codon.

898 **Table S12** *HAC701* mutation differentially expressed genes (DEGs) found in BTH-WRKY45  
899 and BTH-NPR1/NH1 regulated genes that contain W-box motifs. The motifs were identified  
900 1 kb upstream sequence of the start codon.

901

902 **Table S13** Significantly enriched DNA motifs in *HAC701* mutation differentially expressed  
903 genes (DEGs) in *Pso* (*HAC701*mut-DEGs in *Pso*).

904

905 **Table S14** Rice CHIP-sequencing information of histone modifications.

906

907 **Table S15** Identified peaks in H3K9ac and their corresponding genes in 9-WT/9-*I2b*<sup>-/-</sup> (wild  
908 type/mutant). Colored boxes indicate the repeated genes.

909

910 **Table S16** Summary of total RNA-sequencing data in systemic tissues.

911

912 **Table S17** List of R genes upregulated in *hac701* in *Pso*.

913

914 **Table S18** Identified peaks in H3K9me3 and their corresponding genes in *9-12b<sup>-/-</sup>*/Input  
915 (mutant/Input). Colored boxes indicate repeated genes.

916

917 **Table S19** Oligonucleotides used for RT-qPCRs (1) and ChIP-qPCRs (2).

918

## 919 **ACKNOWLEDGEMENTS**

920 We thank OIST SQC for RNA-seq and ChIP-seq analysis. This project benefited greatly from  
921 the comments of Drs. Yusuke Saijo, Hirofumi Nakagami, Justin Walley, Yasuhiro Kadota, and  
922 from the members of the Plant Epigenetics Unit (OIST) and Plant Immunity Research Group  
923 (RIKEN CSRS).

924

## 925 **FUNDING**

926 This work was supported in part by the Okinawa Institute of Science and Technology Graduate  
927 University (OIST). N.A.E. was also funded by Grant-in-Aid for JSPS Fellows (Grant No:  
928 18F18085). The funders had no role in study design, data collection and analysis, decision to  
929 publish, or preparation of the manuscript.

930

## 931 **AUTHOR CONTRIBUTIONS**

932 NAE: Conceptualization, Data curation, Funding acquisition, Formal analysis, Investigation,  
933 Visualization, Writing-original draft, Writing-review & editing

934 LNT: Data curation, Formal analysis, Writing-review & editing

935 SM: Formal analysis, Investigation

936 YS: Formal analysis, Investigation

937 KS: Funding acquisition, Formal analysis, Supervision, Writing-review & editing

938 HS: Funding acquisition, Formal analysis, Investigation, Supervision, Writing-review &  
939 editing

940

#### 941 **COMPETING INTERESTS**

942 The authors have declared that no competing interests exist.

943

#### 944 **REFERENCES**

945 1. Lee KK & Workman JL (2007) Histone acetyltransferase complexes: one size doesn't  
946 fit all. *Nat. Rev. Mol. Cell Biol.* 8(4):284-295.

947 2. Chan HM & La Thangue NB (2001) p300/CBP proteins: HATs for transcriptional  
948 bridges and scaffolds. *J. Cell Sci.* 114(Pt 13):2363-2373.

949 3. Kalkhoven E (2004) CBP and p300: HATs for different occasions. *Biochem.*  
950 *Pharmacol.* 68(6):1145-1155.

951 4. Janknecht R & Hunter T (1996) Transcription. A growing coactivator network.  
952 *Nature* 383(6595):22-23.

953 5. Goodrich JA & Tjian R (1994) TBP-TAF complexes: selectivity factors for  
954 eukaryotic transcription. *Curr. Opin. Cell Biol.* 6(3):403-409.

955 6. Pandey R, *et al.* (2002) Analysis of histone acetyltransferase and histone deacetylase  
956 families of *Arabidopsis thaliana* suggests functional diversification of chromatin  
957 modification among multicellular eukaryotes. *Nucleic Acids Res.* 30(23):5036-5055.

958 7. Liu X, *et al.* (2012) Histone acetyltransferases in rice (*Oryza sativa* L.): phylogenetic  
959 analysis, subcellular localization and expression. *BMC Plant Biol.* 12:145.

960 8. Fang H, Liu X, Thorn G, Duan J, & Tian L (2014) Expression analysis of histone  
961 acetyltransferases in rice under drought stress. *Biochem. Biophys. Res. Commun.*  
962 443(2):400-405.

963 9. Ma X, Lv S, Zhang C, & Yang C (2013) Histone deacetylases and their functions in  
964 plants. *Plant Cell Rep.* 32(4):465-478.

- 965 10. Song G & Walley JW (2016) Dynamic Protein Acetylation in Plant–Pathogen  
966 Interactions. *Frontiers in plant science* 7.
- 967 11. Ding B & Wang GL (2015) Chromatin versus pathogens: the function of epigenetics  
968 in plant immunity. *Frontiers in plant science* 6:675.
- 969 12. Zhu QH, Shan WX, Ayliffe MA, & Wang MB (2016) Epigenetic Mechanisms: An  
970 Emerging Player in Plant-Microbe Interactions. *Molecular plant-microbe interactions*  
971 : *MPMI* 29(3):187-196.
- 972 13. Fu W, Wu K, & Duan J (2007) Sequence and expression analysis of histone  
973 deacetylases in rice. *Biochem. Biophys. Res. Commun.* 356(4):843-850.
- 974 14. Yuan LW & Giordano A (2002) Acetyltransferase machinery conserved in  
975 p300/CBP-family proteins. *Oncogene* 21(14):2253-2260.
- 976 15. Ogryzko VV, Schiltz RL, Russanova V, Howard BH, & Nakatani Y (1996) The  
977 transcriptional coactivators p300 and CBP are histone acetyltransferases. *Cell*  
978 87(5):953-959.
- 979 16. Bannister AJ & Kouzarides T (1996) The CBP co-activator is a histone  
980 acetyltransferase. *Nature* 384(6610):641-643.
- 981 17. Henry RA, Kuo YM, & Andrews AJ (2013) Differences in specificity and selectivity  
982 between CBP and p300 acetylation of histone H3 and H3/H4. *Biochemistry*  
983 52(34):5746-5759.
- 984 18. Jin Q, *et al.* (2011) Distinct roles of GCN5/PCAF-mediated H3K9ac and CBP/p300-  
985 mediated H3K18/27ac in nuclear receptor transactivation. *EMBO J.* 30(2):249-262.
- 986 19. Tie F, *et al.* (2009) CBP-mediated acetylation of histone H3 lysine 27 antagonizes  
987 *Drosophila* Polycomb silencing. *Development* 136(18):3131-3141.
- 988 20. Das C, Lucia MS, Hansen KC, & Tyler JK (2009) CBP/p300-mediated acetylation of  
989 histone H3 on lysine 56. *Nature* 459(7243):113-117.
- 990 21. Schiltz RL, *et al.* (1999) Overlapping but distinct patterns of histone acetylation by  
991 the human coactivators p300 and PCAF within nucleosomal substrates. *J. Biol. Chem.*  
992 274(3):1189-1192.
- 993 22. Sakamoto S, *et al.* (2012) E2A and CBP/p300 act in synergy to promote chromatin  
994 accessibility of the immunoglobulin kappa locus. *J. Immunol.* 188(11):5547-5560.
- 995 23. Modak R, *et al.* (2013) Probing p300/CBP associated factor (PCAF)-dependent  
996 pathways with a small molecule inhibitor. *ACS chemical biology* 8(6):1311-1323.



- 997 24. Espinas NA, Saze H, & Saijo Y (2016) Epigenetic Control of Defense Signaling and  
998 Priming in Plants. *Frontiers in plant science* 7.
- 999 25. Kuwata H (1985) *Pseudomonas syringiae* pv. *oryzae* pv. nov., causal agent of  
1000 bacterial halo blight of rice. *Ann Phytopath. Soc. Japan* 51:212-218.
- 1001 26. Kang S, Kang K, Lee K, & Back K (2007) Characterization of rice tryptophan  
1002 decarboxylases and their direct involvement in serotonin biosynthesis in transgenic  
1003 rice. *Planta* 227(1):263-272.
- 1004 27. Ishihara A, *et al.* (2008) The tryptophan pathway is involved in the defense responses  
1005 of rice against pathogenic infection via serotonin production. *Plant J.* 54(3):481-495.
- 1006 28. Shimizu T, *et al.* (2012) Purification and identification of naringenin 7-O-  
1007 methyltransferase, a key enzyme in biosynthesis of flavonoid phytoalexin sakuranetin  
1008 in rice. *J. Biol. Chem.* 287(23):19315-19325.
- 1009 29. Ogawa S, *et al.* (2017) OsMYC2, an essential factor for JA-inductive sakuranetin  
1010 production in rice, interacts with MYC2-like proteins that enhance its transactivation  
1011 ability. *Scientific reports* 7:40175.
- 1012 30. Swaminathan S, Morrone D, Wang Q, Fulton DB, & Peters RJ (2009) CYP76M7 is  
1013 an ent-cassadiene C11 $\alpha$ -hydroxylase defining a second multifunctional  
1014 diterpenoid biosynthetic gene cluster in rice. *Plant Cell* 21(10):3315-3325.
- 1015 31. Vanholme R, Demedts B, Morreel K, Ralph J, & Boerjan W (2010) Lignin  
1016 biosynthesis and structure. *Plant Physiol.* 153(3):895-905.
- 1017 32. Wang Q, *et al.* (2012) Characterization of CYP76M5-8 indicates metabolic plasticity  
1018 within a plant biosynthetic gene cluster. *J. Biol. Chem.* 287(9):6159-6168.
- 1019 33. Nakayama A, *et al.* (2013) Genome-wide identification of WRKY45-regulated genes  
1020 that mediate benzothiadiazole-induced defense responses in rice. *BMC Plant Biol.*  
1021 13(150).
- 1022 34. Shimono M, *et al.* (2007) Rice WRKY45 plays a crucial role in benzothiadiazole-  
1023 inducible blast resistance. *Plant Cell* 19(6):2064-2076.
- 1024 35. Sugano S, *et al.* (2010) Role of OsNPR1 in rice defense program as revealed by  
1025 genome-wide expression analysis. *Plant Mol. Biol.* 74(6):549-562.
- 1026 36. Cheng X, *et al.* (2019) Structural basis of dimerization and dual W-box DNA  
1027 recognition by rice WRKY domain. *Nucleic Acids Res.* 47(8):4308-4318.

- 1028 37. Parker D, *et al.* (1996) Phosphorylation of CREB at Ser-133 induces complex  
1029 formation with CREB-binding protein via a direct mechanism.pdf>. *Mol. Cell.*  
1030 *Biol.*:694-703.
- 1031 38. Yadav A, Thakur JK, & Yadav G (2017) KIXBASE: A comprehensive web resource  
1032 for identification and exploration of KIX domains. *Scientific reports* 7(1):14924.
- 1033 39. Thakur JK, Yadav A, & Yadav G (2014) Molecular recognition by the KIX domain  
1034 and its role in gene regulation. *Nucleic Acids Res.* 42(4):2112-2125.
- 1035 40. Dancy BM & Cole PA (2015) Protein Lysine Acetylation by p300/CBP. *Chemical*  
1036 *reviews* 115(6):2419-2452.
- 1037 41. Du Z, *et al.* (2013) Genome-wide analysis of histone modifications: H3K4me2,  
1038 H3K4me3, H3K9ac, and H3K27ac in *Oryza sativa* L. Japonica. *Molecular plant*  
1039 6(5):1463-1472.
- 1040 42. Sarris PF, Cevik V, Dagdas G, Jones JD, & Krasileva KV (2016) Comparative  
1041 analysis of plant immune receptor architectures uncovers host proteins likely targeted  
1042 by pathogens. *BMC Biol.* 14:8.
- 1043 43. Weidenbach D, *et al.* (2016) Polarized Defense Against Fungal Pathogens Is  
1044 Mediated by the Jacalin-Related Lectin Domain of Modular Poaceae-Specific  
1045 Proteins. *Molecular plant* 9(4):514-527.
- 1046 44. Chen X, *et al.* (2019) Transcriptome and Proteome Profiling of Different Colored  
1047 Rice Reveals Physiological Dynamics Involved in the Flavonoid Pathway.  
1048 *International journal of molecular sciences* 20(10).
- 1049 45. Holler S, *et al.* (2015) Ascorbate biosynthesis and its involvement in stress tolerance  
1050 and plant development in rice (*Oryza sativa* L.). *Plant Mol. Biol.* 88(6):545-560.
- 1051 46. Singh P, *et al.* (2014) Environmental History Modulates Arabidopsis Pattern-  
1052 Triggered Immunity in a HISTONE ACETYLTRANSFERASE1-Dependent Manner.  
1053 *Plant Cell.*
- 1054 47. Kim S, *et al.* (2020) GCN5 modulates salicylic acid homeostasis by regulating  
1055 H3K14ac levels at the 5' and 3' ends of its target genes. *Nucleic Acids Res.*  
1056 48(11):5953-5966.
- 1057 48. De Vleeschauwer D, Gheysen G, & Hofte M (2013) Hormone defense networking in  
1058 rice: tales from a different world. *Trends Plant Sci.* 18(10):555-565.
- 1059 49. Vidhyasekaran P (2016) *Switching on plant innate immunity signaling systems*  
1060 (Springer International Publishing, Switzerland).

- 1061 50. De Vleeschauwer D, Xu J, & Hofte M (2014) Making sense of hormone-mediated  
1062 defense networking: from rice to Arabidopsis. *Frontiers in plant science* 5:611.
- 1063 51. Yang DL, Yang Y, & He Z (2013) Roles of plant hormones and their interplay in rice  
1064 immunity. *Molecular plant* 6(3):675-685.
- 1065 52. Yan S & Dong X (2014) Perception of the plant immune signal salicylic acid. *Curr.*  
1066 *Opin. Plant Biol.* 20:64-68.
- 1067 53. Silverman P, *et al.* (1995) Salicylic acid in rice (biosynthesis, conjugation, and  
1068 possible role). *Plant Physiol.* 108:633-639.
- 1069 54. Chen Z, Iyer S, Caplan A, Klessig DF, & Fan B (1997) Differential accumulation of  
1070 salicylic acid and salicylic acid-sensitive catalase in different rice tissues. *Plant*  
1071 *Physiol.* 114:193-201.
- 1072 55. Hiebert CW, *et al.* (2020) Stem rust resistance in wheat is suppressed by a subunit of  
1073 the mediator complex. *Nature communications* 11(1):1123.
- 1074 56. Brownell JE & Allis CD (1996) Special HATs for special occasions: linking histone  
1075 acetylation to chromatin assembly and gene activation. *Curr. Opin. Genet. Dev.*  
1076 6:176-184.
- 1077 57. Poss ZC, Ebmeier CC, & Taatjes DJ (2013) The Mediator complex and transcription  
1078 regulation. *Crit. Rev. Biochem. Mol. Biol.* 48(6):575-608.
- 1079 58. Canet JV, Dobon A, & Tornero P (2012) Non-recognition-of-BTH4, an Arabidopsis  
1080 mediator subunit homolog, is necessary for development and response to salicylic  
1081 acid. *Plant Cell* 24(10):4220-4235.
- 1082 59. van der Hoorn RA & Kamoun S (2008) From Guard to Decoy: a new model for  
1083 perception of plant pathogen effectors. *Plant Cell* 20(8):2009-2017.
- 1084 60. Lai Y, *et al.* (2020) The Arabidopsis PHD-finger protein EDM2 has multiple roles in  
1085 balancing NLR immune receptor gene expression. *PLoS Genet.* 16(9):e1008993.
- 1086 61. Jackson JP, *et al.* (2004) Dimethylation of histone H3 lysine 9 is a critical mark for  
1087 DNA methylation and gene silencing in Arabidopsis thaliana. *Chromosoma*  
1088 112(6):308-315.
- 1089 62. Karasov T, Chae E, Herman J, & Bergelson J (2017) Mechanisms to Mitigate the  
1090 Tradeoff between Growth and Defense. *Plant Cell.*
- 1091 63. Huot B, Yao J, Montgomery BL, & He SY (2014) Growth-defense tradeoffs in plants:  
1092 a balancing act to optimize fitness. *Molecular plant* 7(8):1267-1287.

- 1093 64. Xie K & Yang Y (2013) RNA-guided genome editing in plants using a CRISPR-Cas  
1094 system. *Molecular plant* 6(6):1975-1983.
- 1095 65. Heese A, *et al.* (2007) The receptor-like kinase SERK3/BAK1 is a central regulator of  
1096 innate immunity in plants. *Proceedings of the National Academy of Sciences of the*  
1097 *United States of America* 104(29):12217-12222.
- 1098 66. Park CJ & Ronald PC (2012) Cleavage and nuclear localization of the rice XA21  
1099 immune receptor. *Nature communications* 3:920.
- 1100 67. Liu X, *et al.* (2015) Bacterial Leaf Infiltration Assay for Fine Characterization of  
1101 Plant Defense Responses using the Arabidopsis thaliana-Pseudomonas syringae  
1102 Pathosystem. *J Vis Exp* (104).
- 1103 68. Pfaffl MW (2001) A new mathematical model for relative quantification in real-time  
1104 RT-PCR. *Nucleic Acids Res.* 29(9):e45.
- 1105 69. Saleh A, Alvarez-Venegas R, & Avramova Z (2008) An efficient chromatin  
1106 immunoprecipitation (ChIP) protocol for studying histone modifications in  
1107 Arabidopsis plants. *Nature protocols* 3(6):1018-1025.
- 1108 70. Trapnell C, Pachter L, & Salzberg SL (2009) TopHat: discovering splice junctions  
1109 with RNA-Seq. *Bioinformatics* 25(9):1105-1111.
- 1110 71. Trapnell C, *et al.* (2012) Differential gene and transcript expression analysis of RNA-  
1111 seq experiments with TopHat and Cufflinks. *Nature protocols* 7(3):562-578.
- 1112 72. Love MI, Huber W, & Anders S (2014) Moderated estimation of fold change and  
1113 dispersion for RNA-seq data with DESeq2. *Genome biology* 15(12):550.
- 1114 73. Li Q, Brown JB, Huang H, & Bickel PJ (2011) Measuring reproducibility of high-  
1115 throughput experiments. *The Annals of Applied Statistics* 5(3):1752-1779.
- 1116 74. Consortium TGO (2017) Expansion of the Gene Ontology knowledgebase and  
1117 resources. *Nucleic Acids Res.* 45(D1):D331-D338.
- 1118 75. Consortium TGO (2000) Gene Ontology: tool for the unification of biology. *Nat.*  
1119 *Genet.* 25:25-29.
- 1120 76. Consortium TGO (2015) Gene Ontology Consortium: going forward. *Nucleic Acids*  
1121 *Res.* 43(Database issue):D1049-1056.
- 1122 77. Heberle H, Meirelles GV, da Silva FR, Telles GP, & Minghim R (2015)  
1123 InteractiVenn: a web-based tool for the analysis of sets through Venn diagrams. *BMC*  
1124 *Bioinformatics* 16:169.

- 1125 78. Langmead B, Trapnell C, Pop M, & Salzberg SL (2009) Ultrafast and memory-  
1126 efficient alignment of short DNA sequences to the human genome. *Genome biology*  
1127 10(3):R25.
- 1128 79. Freese NH, Norris DC, & Loraine AE (2016) Integrated genome browser: visual  
1129 analytics platform for genomics. *Bioinformatics* 32(14):2089-2095.
- 1130 80. Ramirez F, *et al.* (2016) deepTools2: a next generation web server for deep-  
1131 sequencing data analysis. *Nucleic Acids Res.* 44(W1):W160-165.
- 1132 81. Quinlan AR & Hall IM (2010) BEDTools: a flexible suite of utilities for comparing  
1133 genomic features. *Bioinformatics* 26(6):841-842.
- 1134 82. Heinz S, *et al.* (2010) Simple combinations of lineage-determining transcription  
1135 factors prime cis-regulatory elements required for macrophage and B cell identities.  
1136 *Mol. Cell* 38(4):576-589.
- 1137 83. Dereeper A, *et al.* (2008) Phylogeny.fr: robust phylogenetic analysis for the non-  
1138 specialist. *Nucleic Acids Res.* 36(Web Server issue):W465-469.
- 1139 84. Edgar RC (2004) MUSCLE: multiple sequence alignment with high accuracy and  
1140 high throughput. *Nucleic Acids Res.* 32(5):1792-1797.
- 1141 85. Frith M, Hansen U, & Weng Z (2001) Detection of cis-element clusters in higher  
1142 eukaryotic DNA. *Bioinformatics* 17:878-889.
- 1143 86. Bailey TL (2011) DREME: motif discovery in transcription factor ChIP-seq data.  
1144 *Bioinformatics* 27(12):1653-1659.
- 1145
- 1146

**Figure 1**

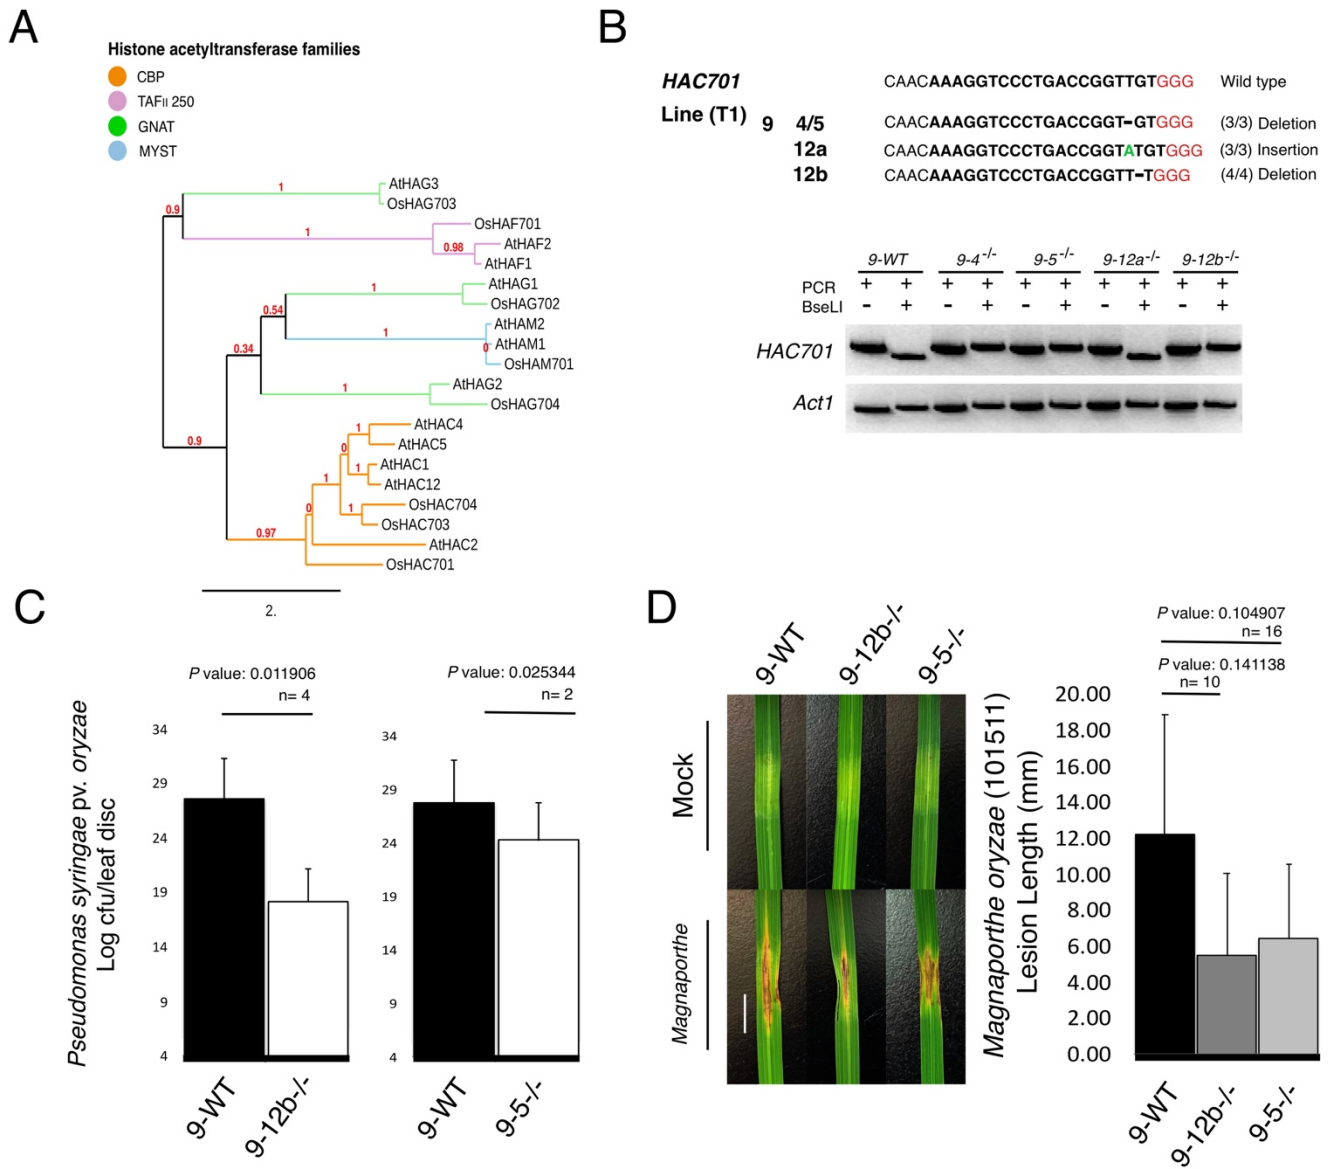

Figure 2

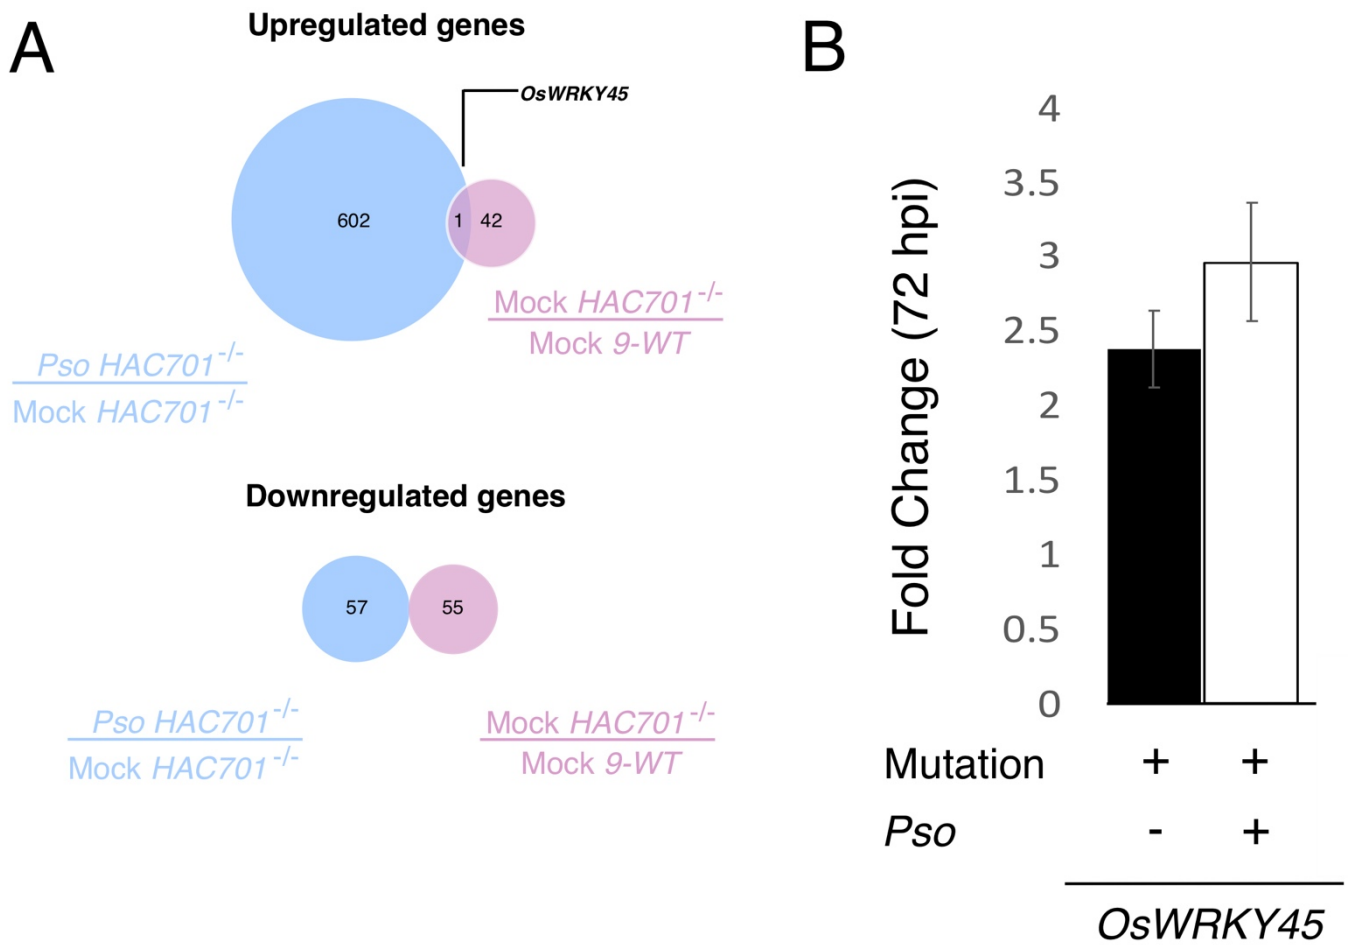

**Figure 3**

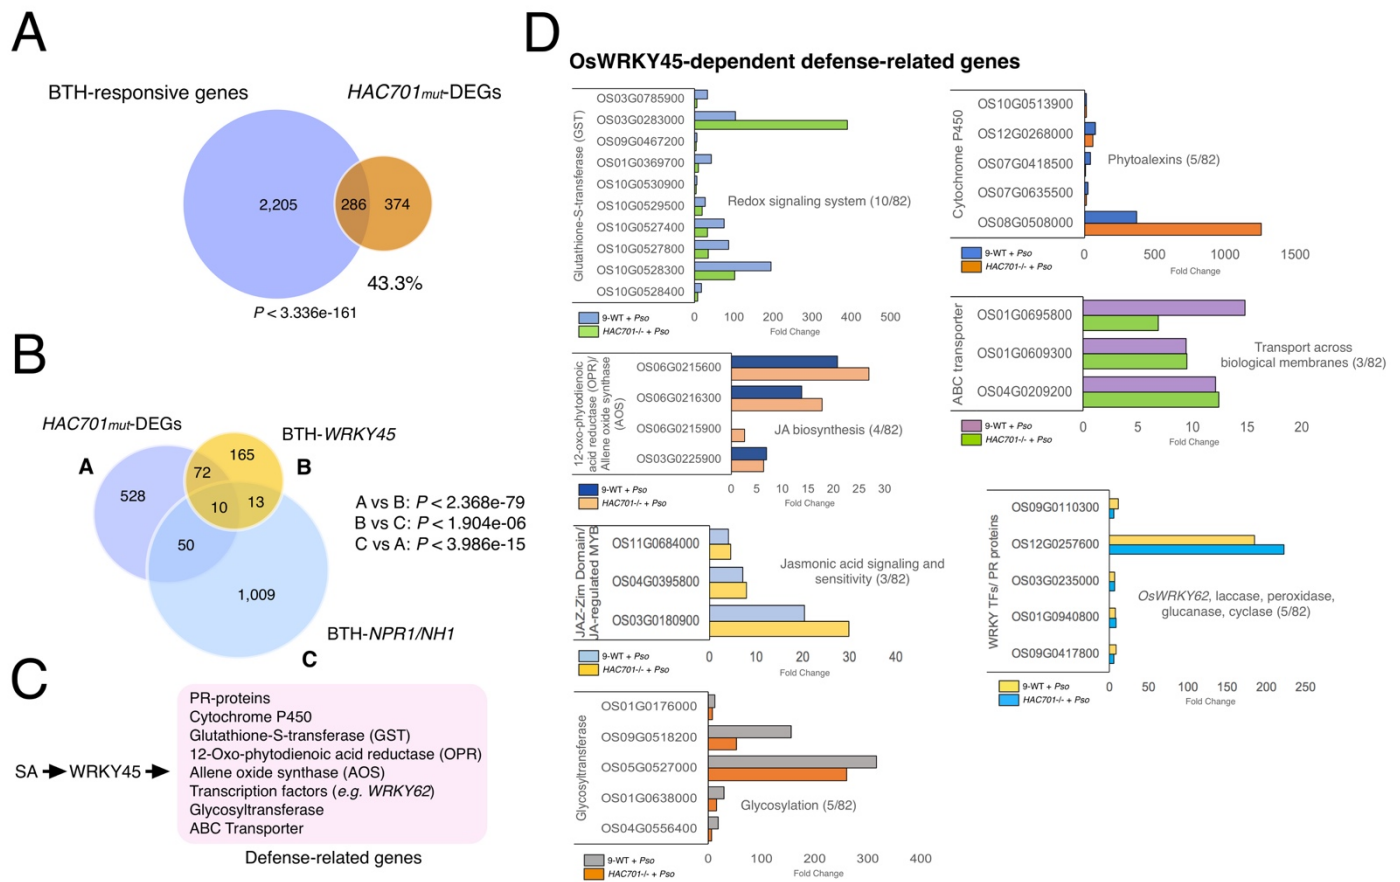



**Figure 4**

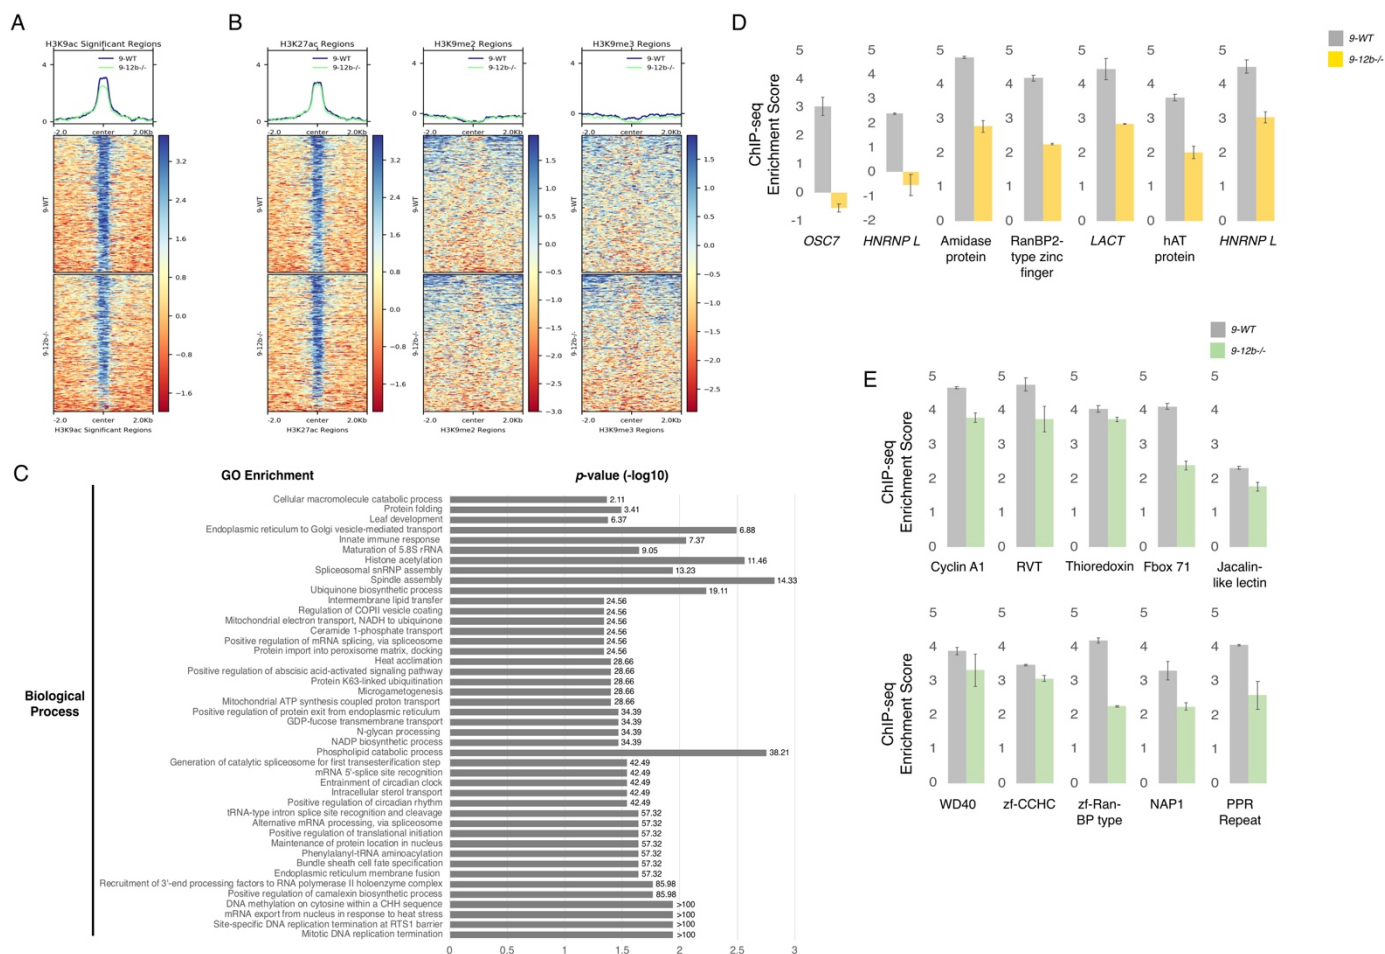

**Figure 5**

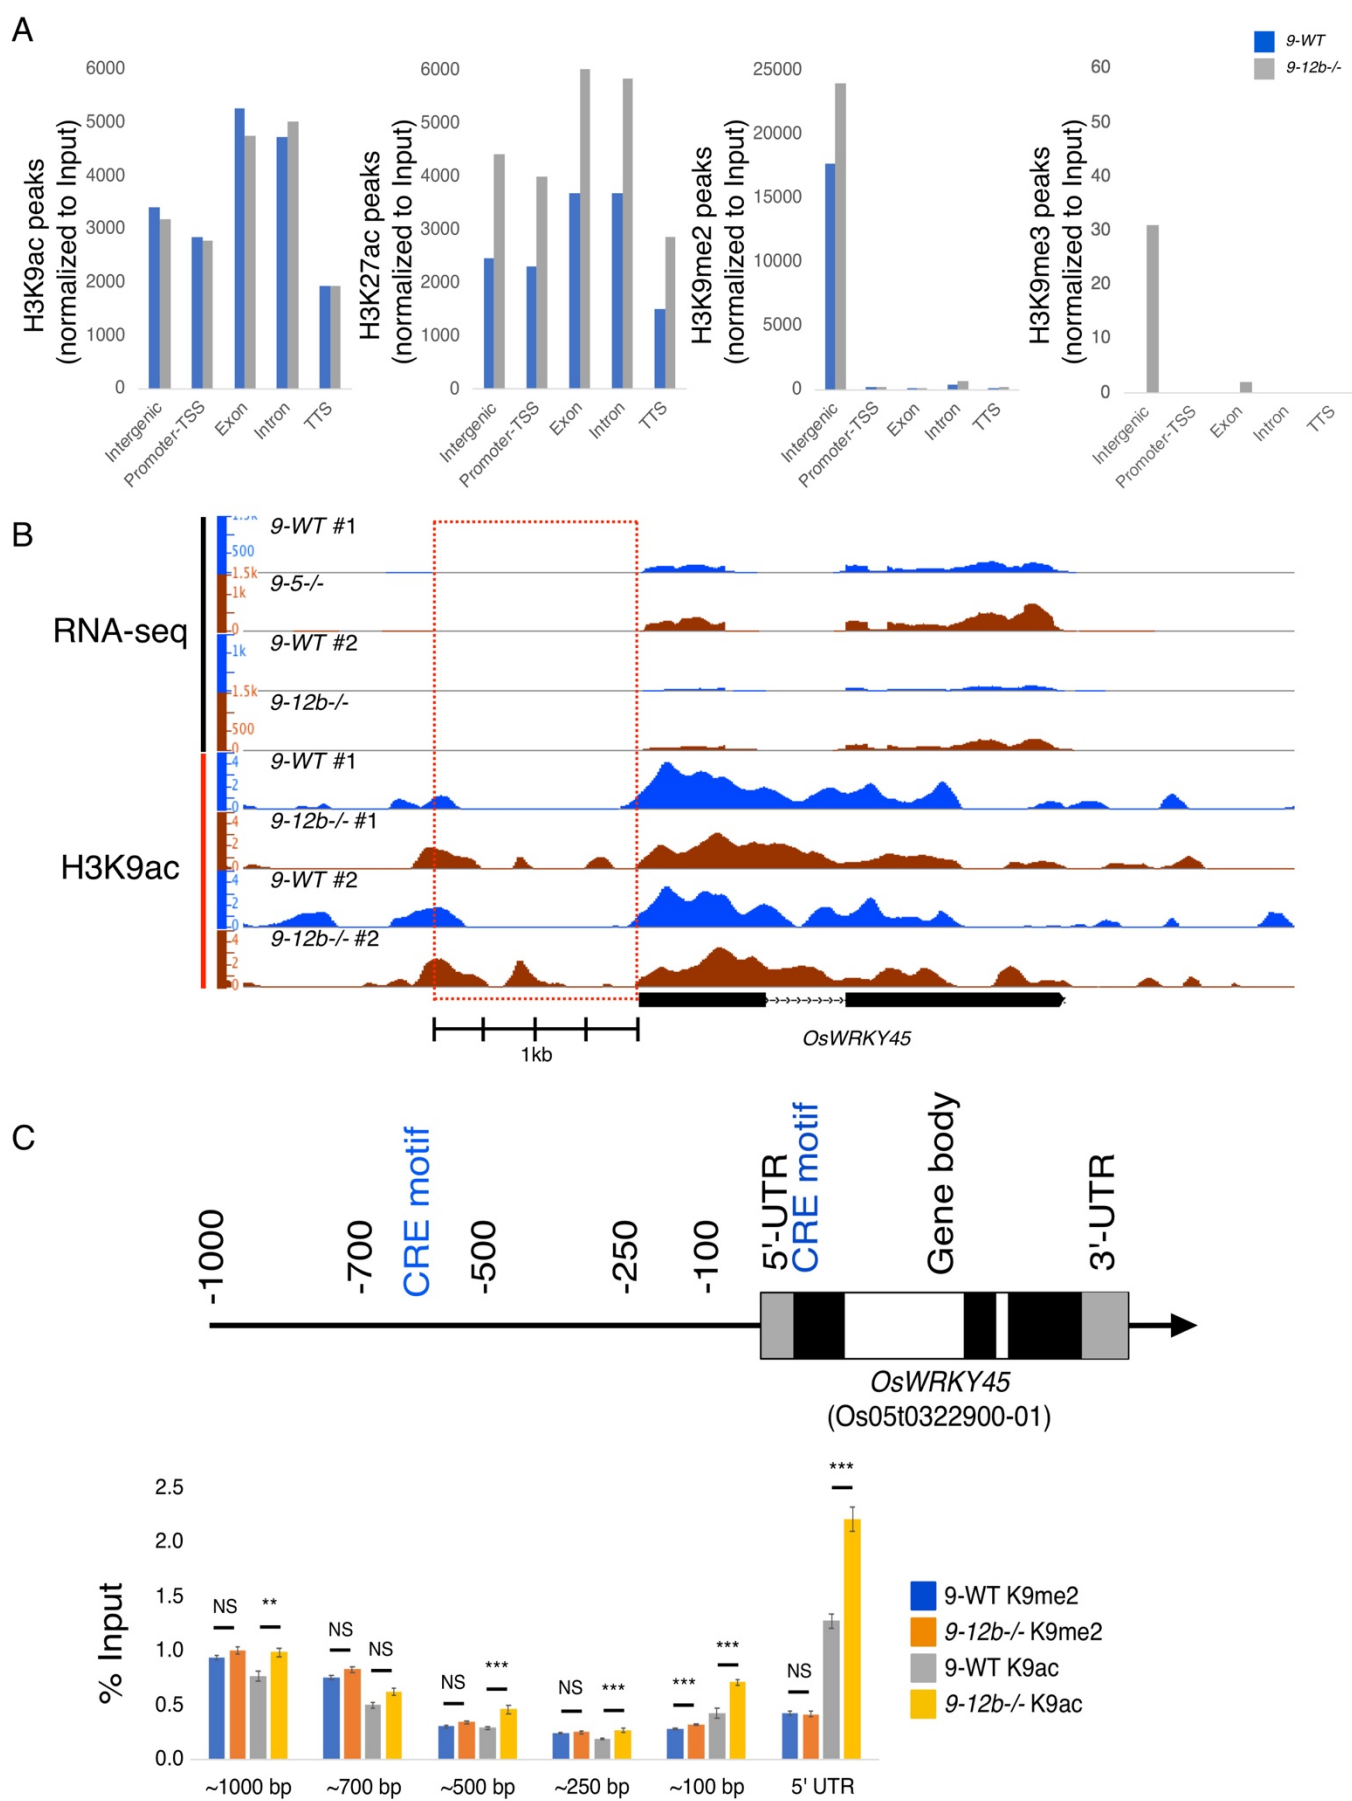

**Figure S1**

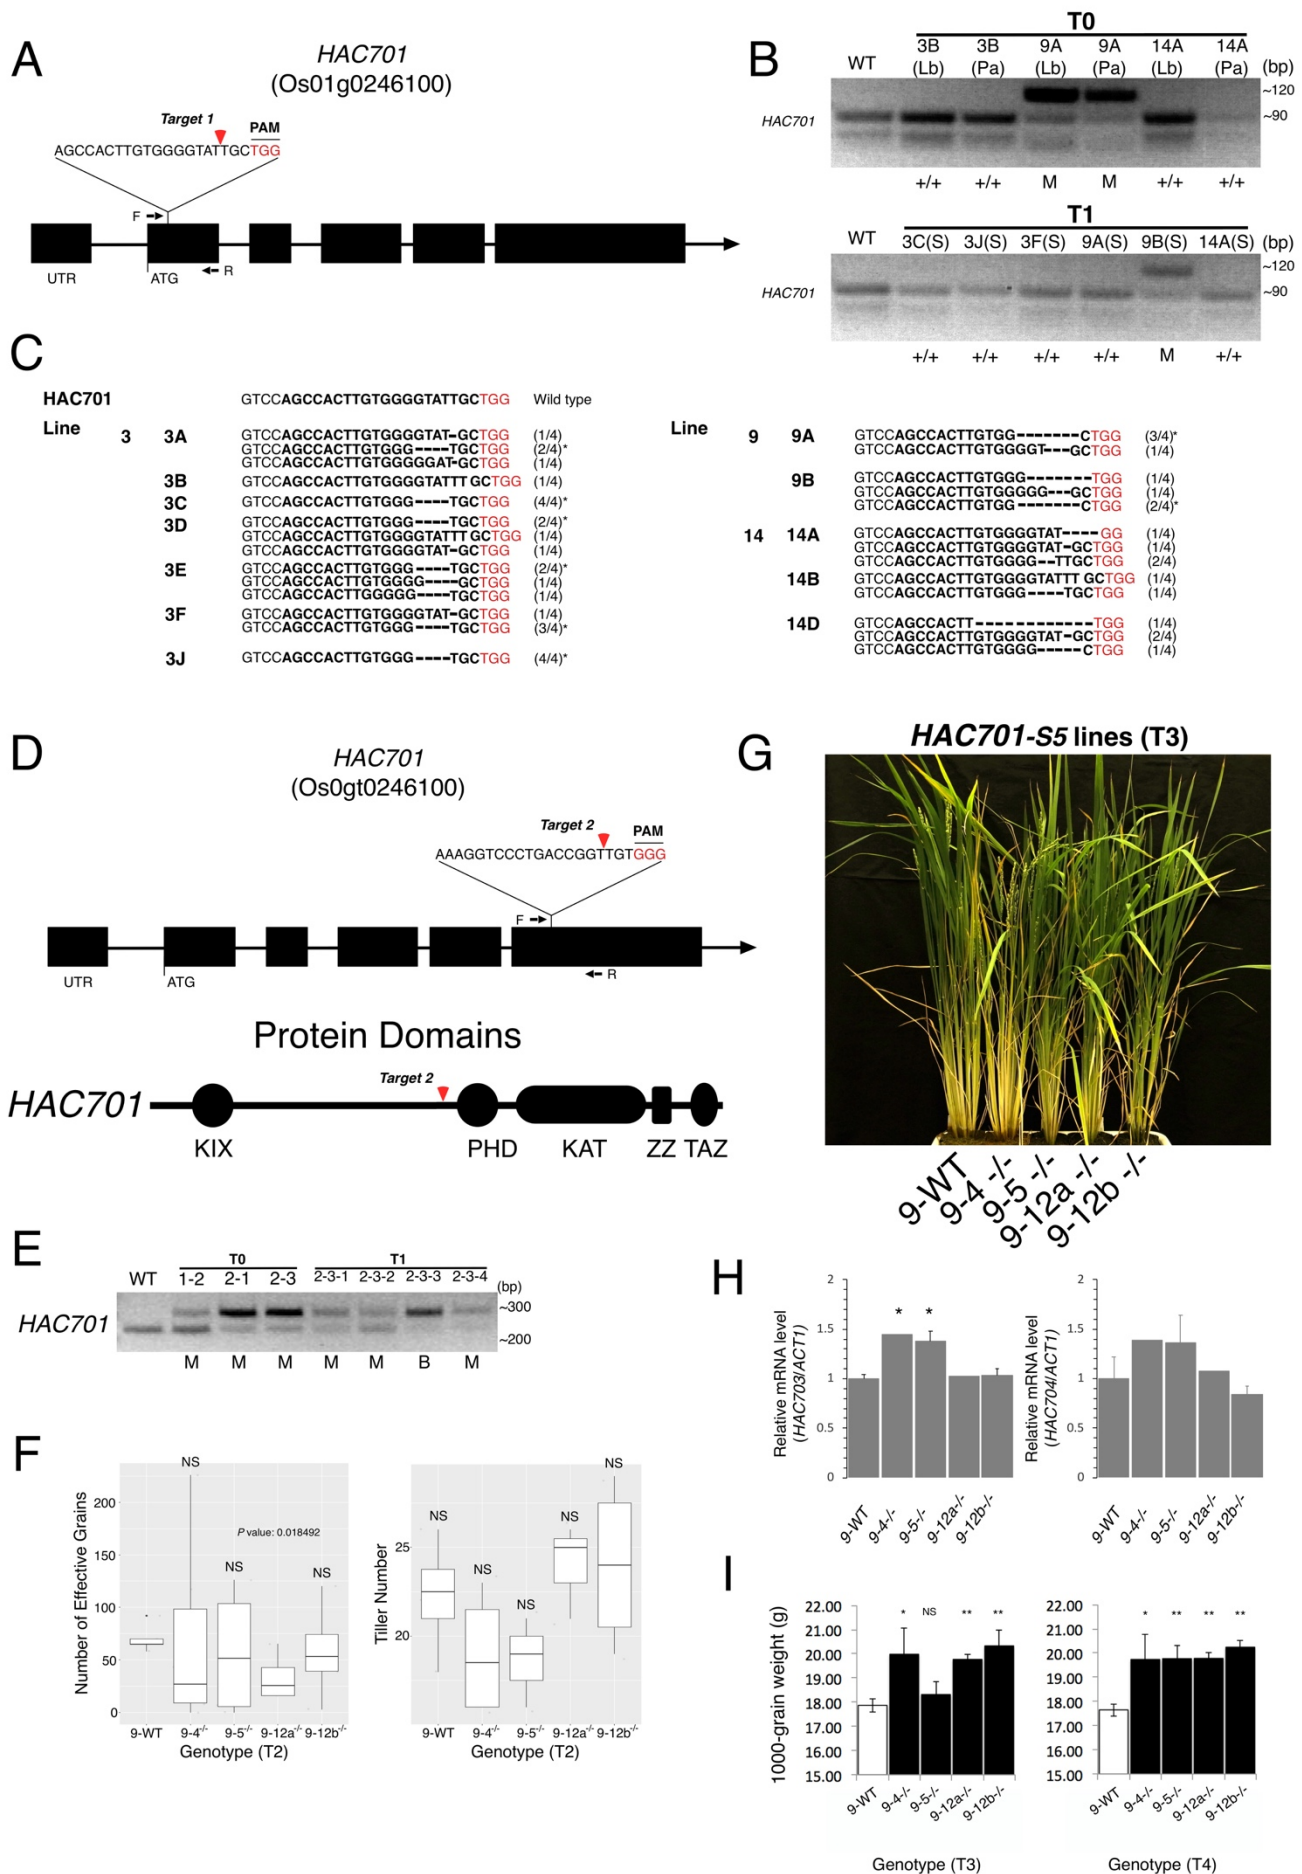

Figure S2

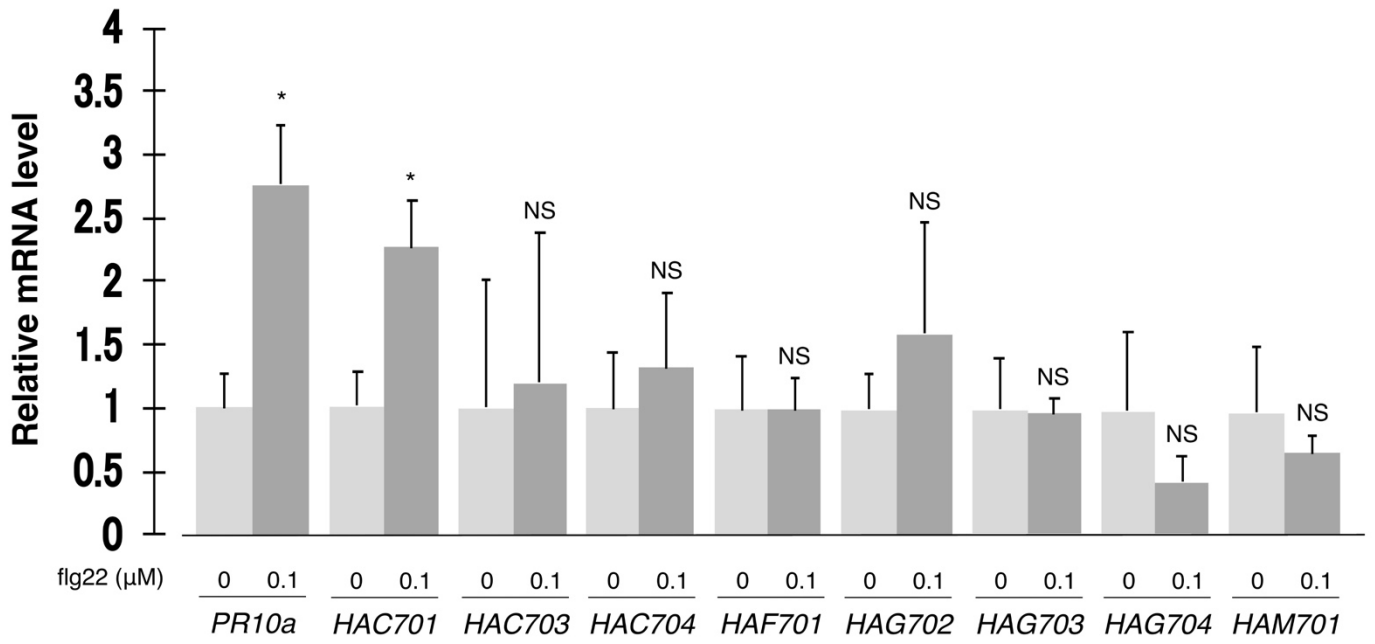

**Figure S3**

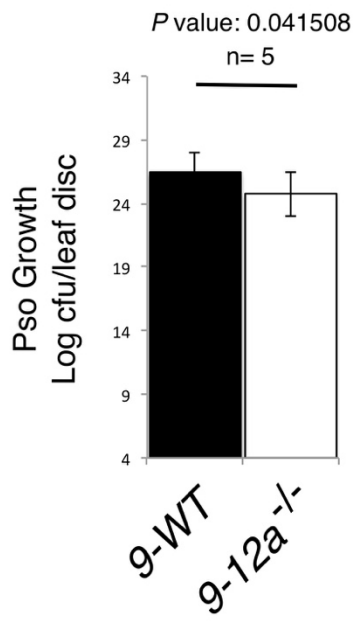

**Figure S4**

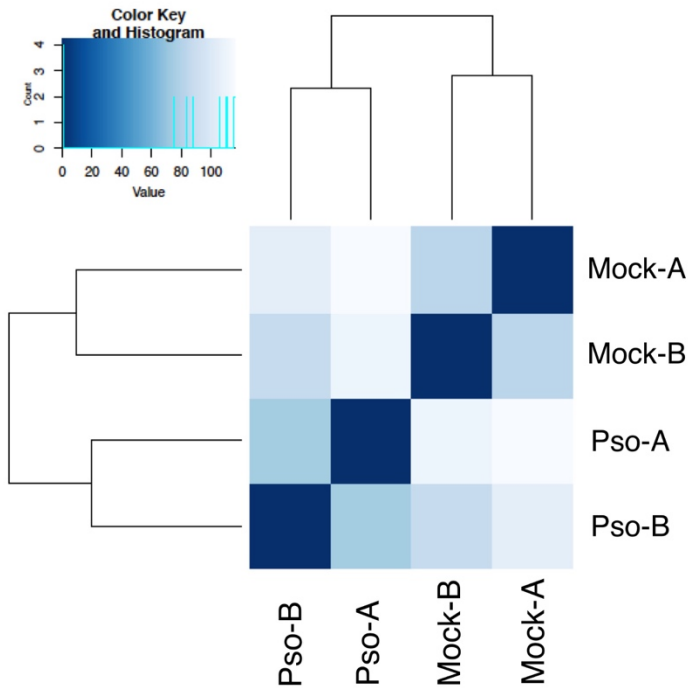

**Figure S5**

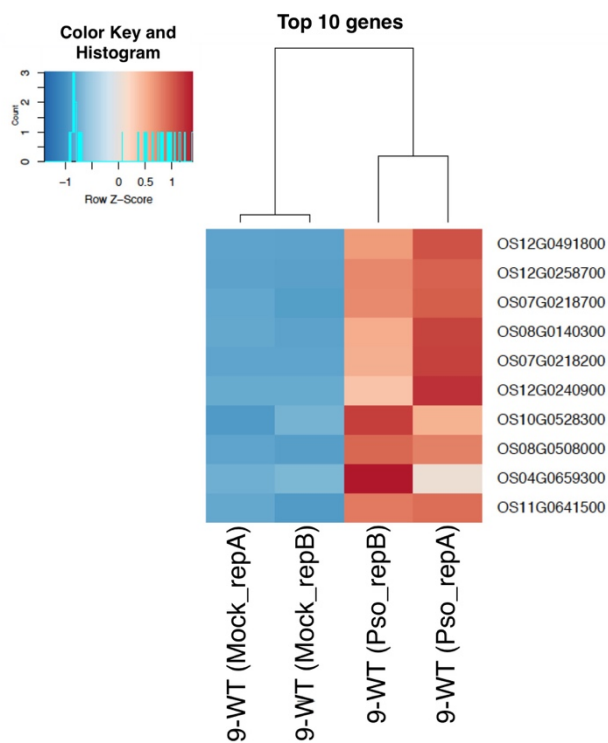

| Gene ID      | Description                      |
|--------------|----------------------------------|
| OS12G0491800 | Kaurene synthase-like 10         |
| OS12G0258700 | Laccase 29                       |
| OS07G0218700 | Cytochrome P450 family protein   |
| OS08G0140300 | Tryptophan decarboxylase 1       |
| OS07G0218200 | Terpene synthase 3               |
| OS12G0240900 | Naringenin 7-O-methyltransferase |
| OS10G0528300 | Tau glutathione S-transferase 4  |
| OS08G0508000 | Cytochrome P450 76M2             |
| OS04G0659300 | Root meander curling             |
| OS11G0641500 | Laccase 23                       |

**Figure S6**

**A**

| <b>Highly enriched terms upon <i>Pseudomonas syringae</i> pv. <i>oryzae</i> infection in 9-WT rice</b> |                 |             |
|--------------------------------------------------------------------------------------------------------|-----------------|-------------|
| Up-regulated terms                                                                                     | Fold Enrichment | raw P-value |
| Cell wall macromolecule catabolic process                                                              | 54.94           | 4.22E-07    |
| Adventitious root development                                                                          | 54.94           | 3.54E-02    |
| Lignin biosynthetic process                                                                            | 54.94           | 3.54E-02    |
| Sphingolipid biosynthetic process                                                                      | 54.94           | 3.54E-02    |
| Gibberellin biosynthetic process                                                                       | 54.94           | 3.54E-02    |
| Chitin catabolic process                                                                               | 54.94           | 4.22E-07    |
| Response to wounding                                                                                   | 54.94           | 3.54E-02    |
| Response to other organism                                                                             | 54.94           | 2.70E-08    |
| ent-kaurene oxidation to kaurenoic acid                                                                | 54.94           | 3.54E-02    |
| Diterpene phytoalexin precursor biosynthetic process pathway                                           | 41.21           | 1.89E-04    |
| Shikimate biosynthetic process                                                                         | 36.63           | 3.08E-03    |
| Chorismate biosynthetic process                                                                        | 36.63           | 3.08E-03    |
| Carbohydrate transport                                                                                 | 18.31           | 8.32E-03    |
| Carbohydrate metabolic process                                                                         | 5.78            | 6.62E-03    |
| Electron transport chain                                                                               | 5.49            | 1.17E-03    |
| Regulation of transcription, DNA templated                                                             | 2.79            | 2.43E-02    |

  

| Down-regulated terms                       | Fold Enrichment | raw P-value |
|--------------------------------------------|-----------------|-------------|
| Regulation of transcription, DNA templated | 10.26           | 1.69E-02    |

**B**

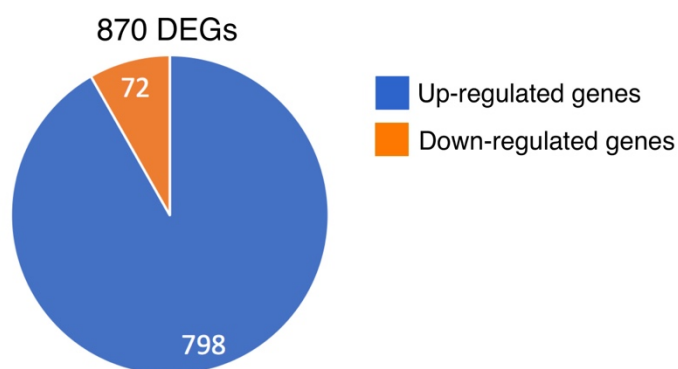

**9-WT in *Pso* treatment**



## Figure S7

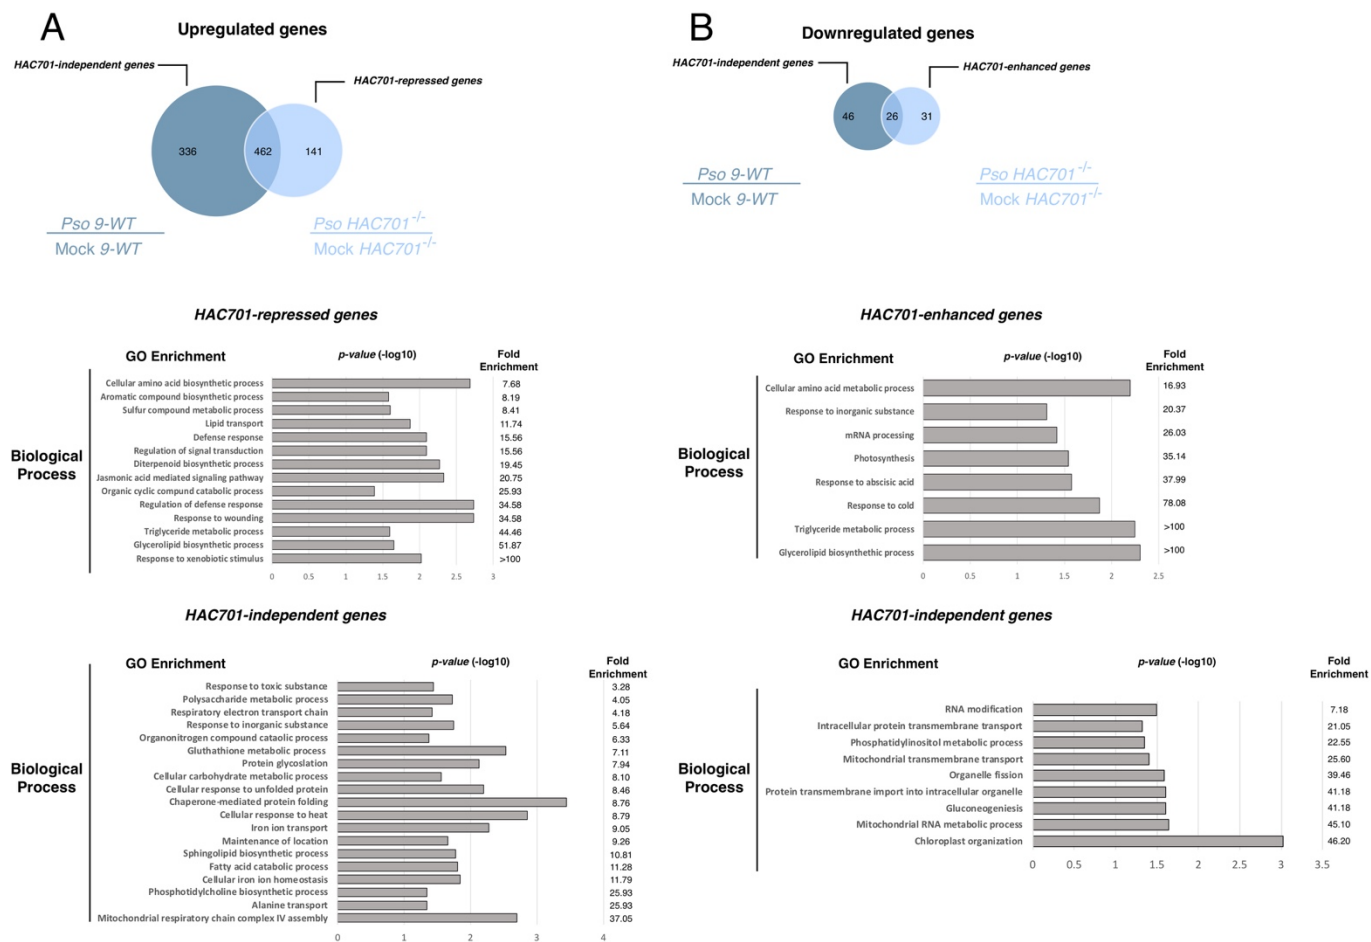



Figure S9

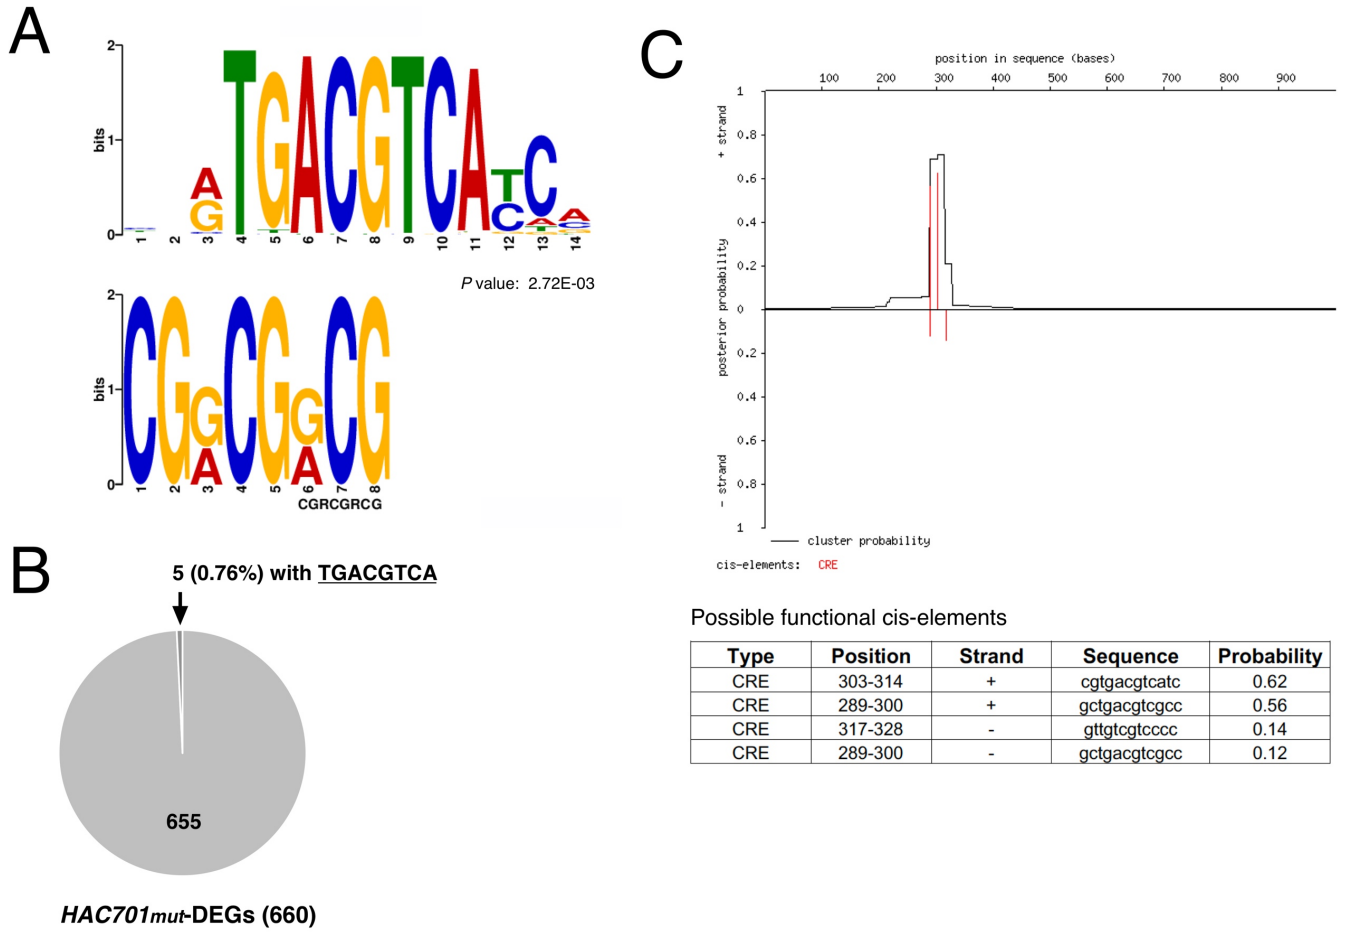

**Figure S10**

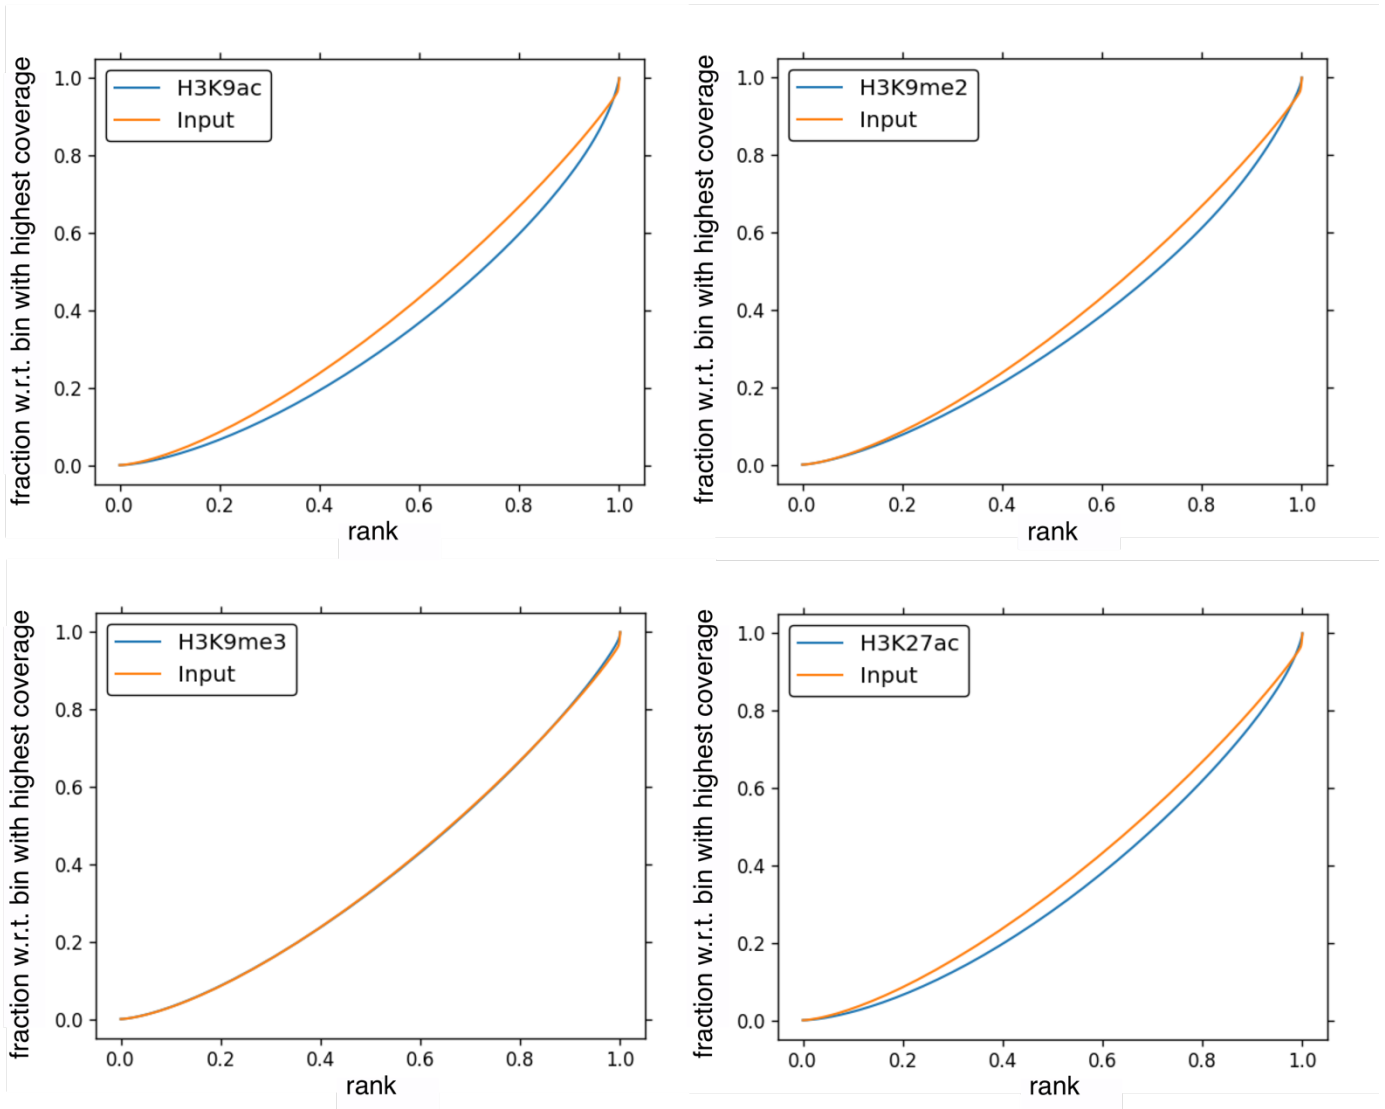

Figure S11

A

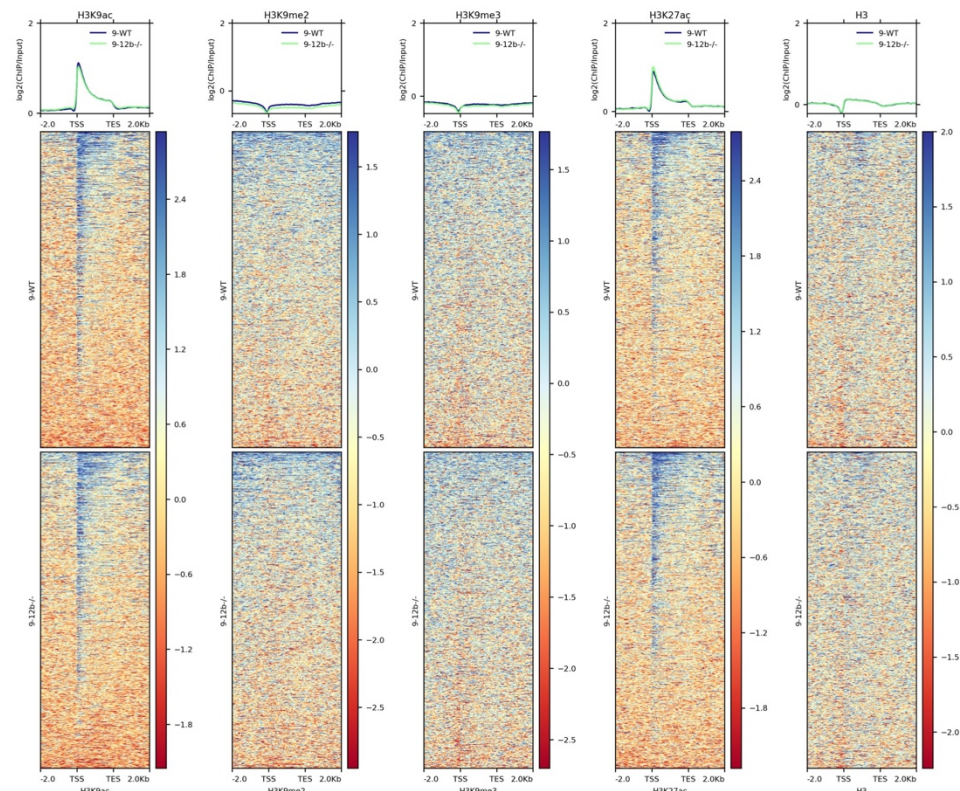

Genes

B

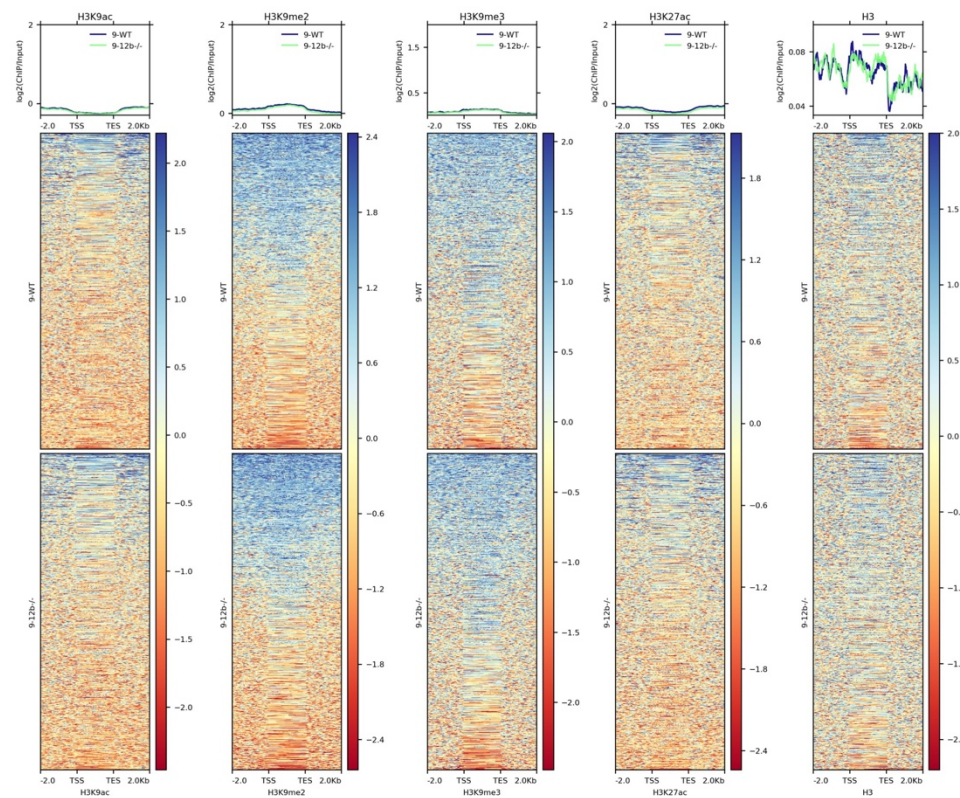

Transposable elements

Figure S12

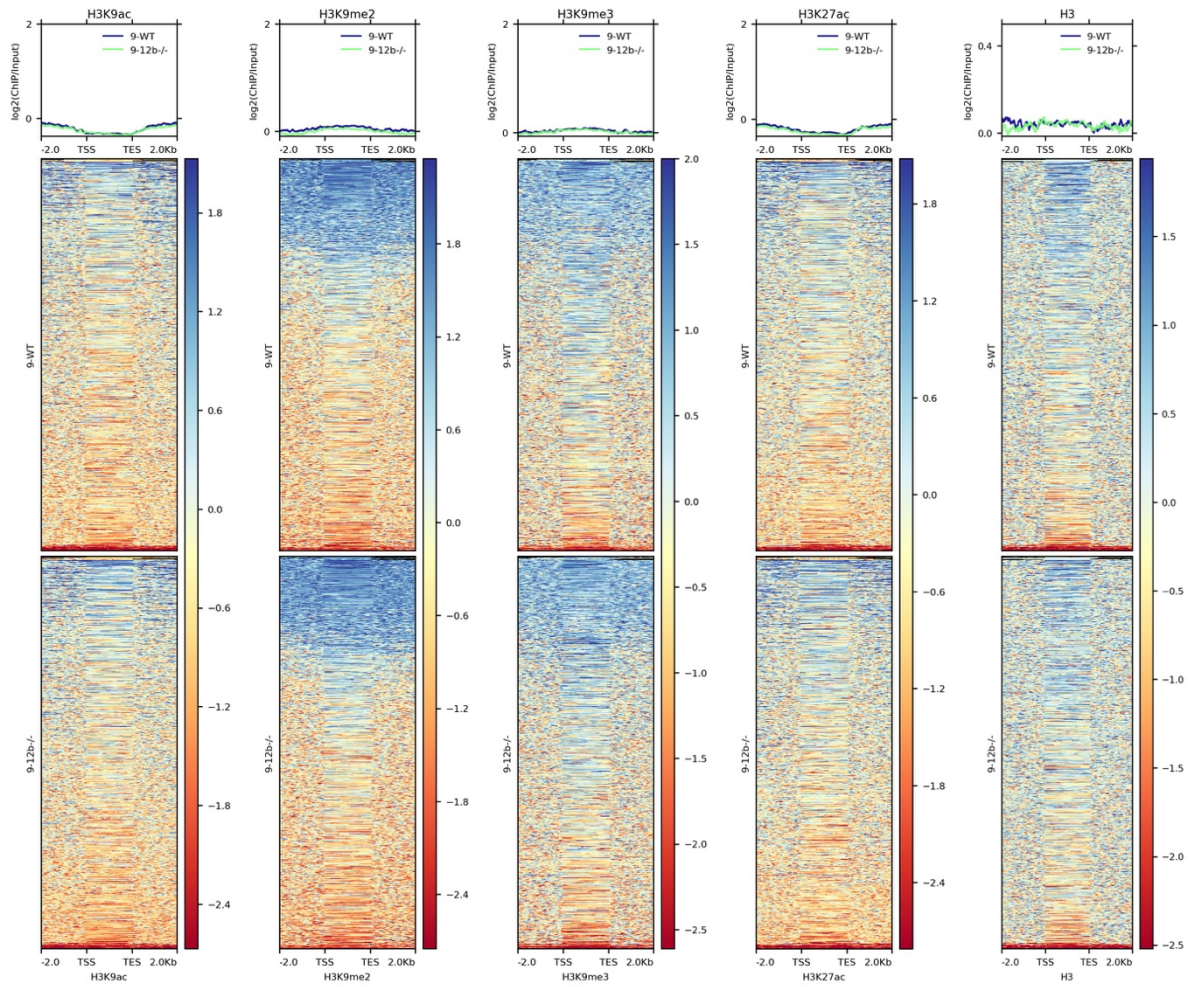

Simple Repeats

**Figure S13**

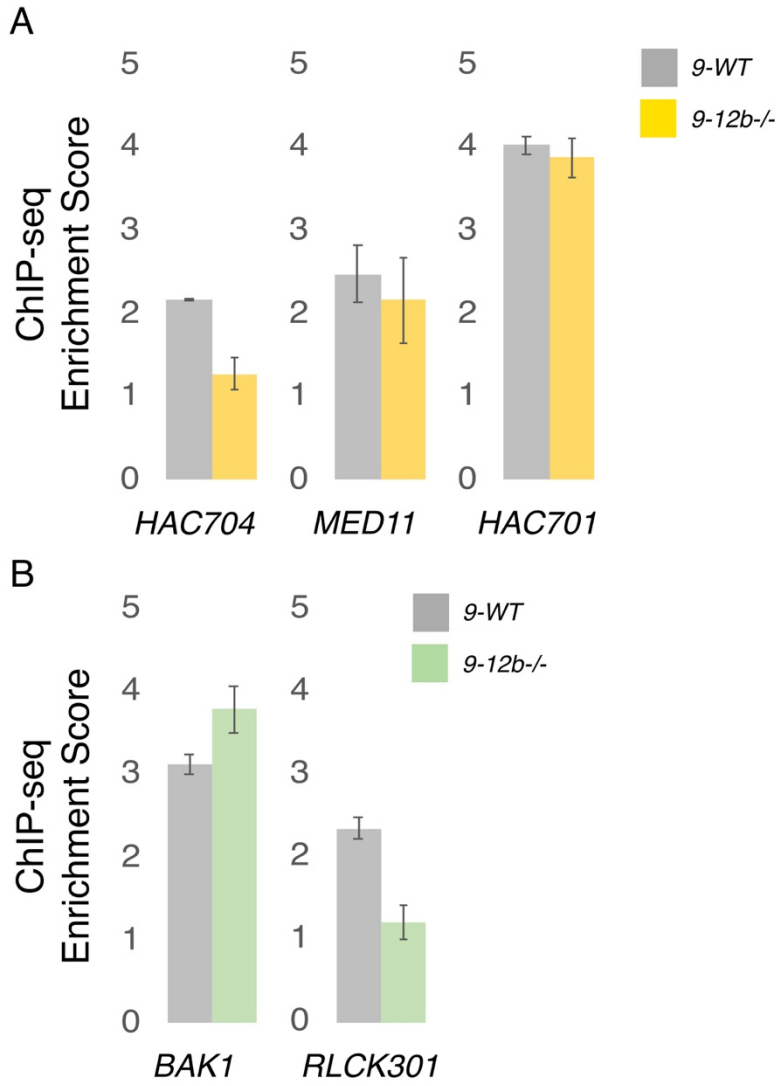

**Figure S14**

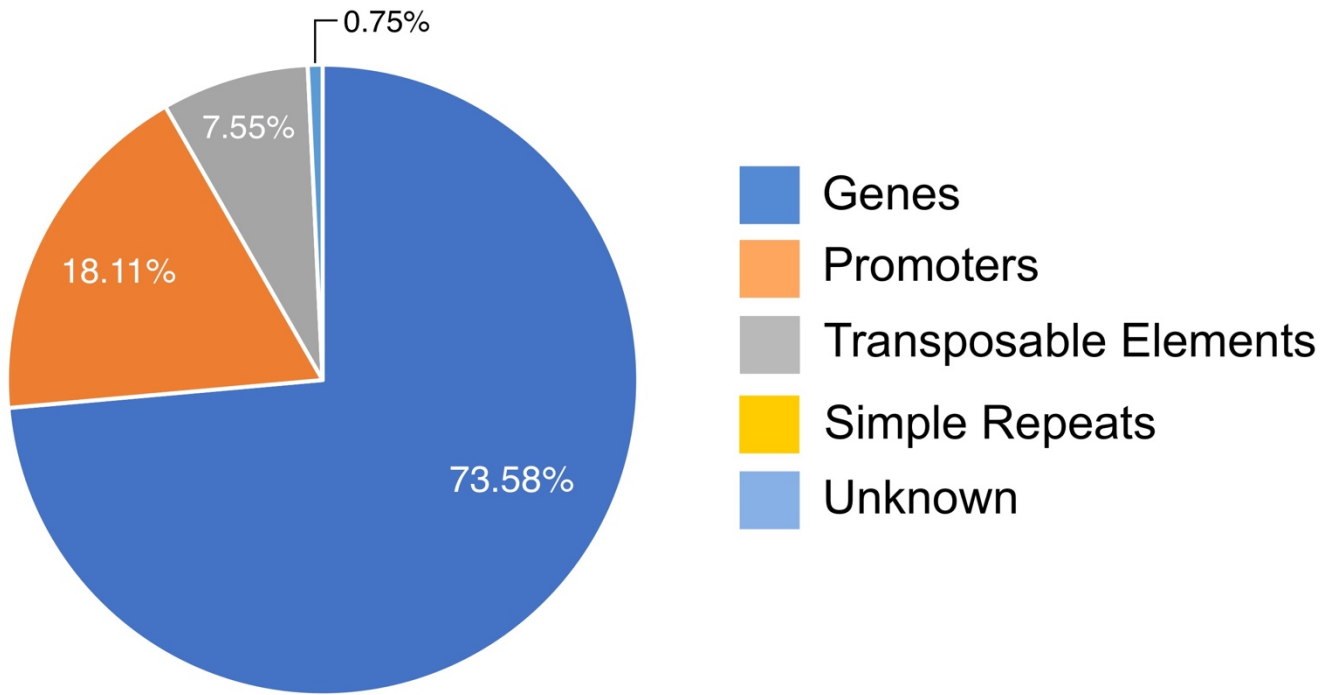



**Figure S15**

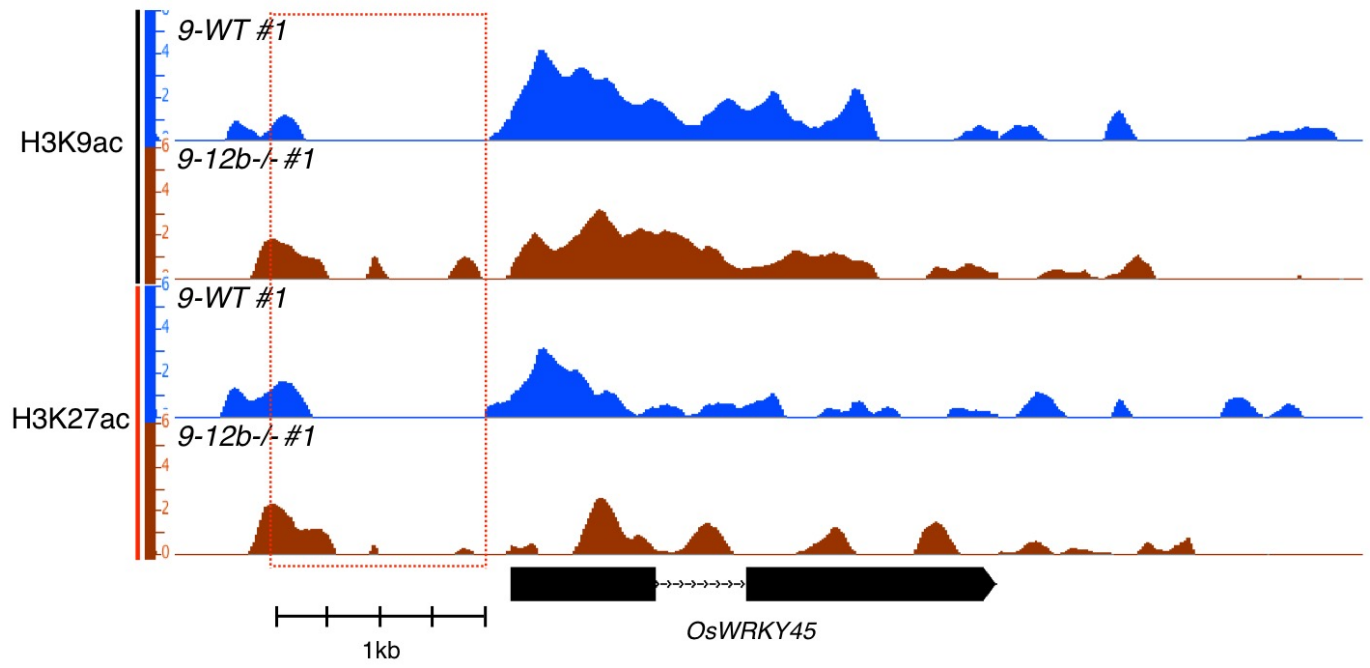

Figure S16

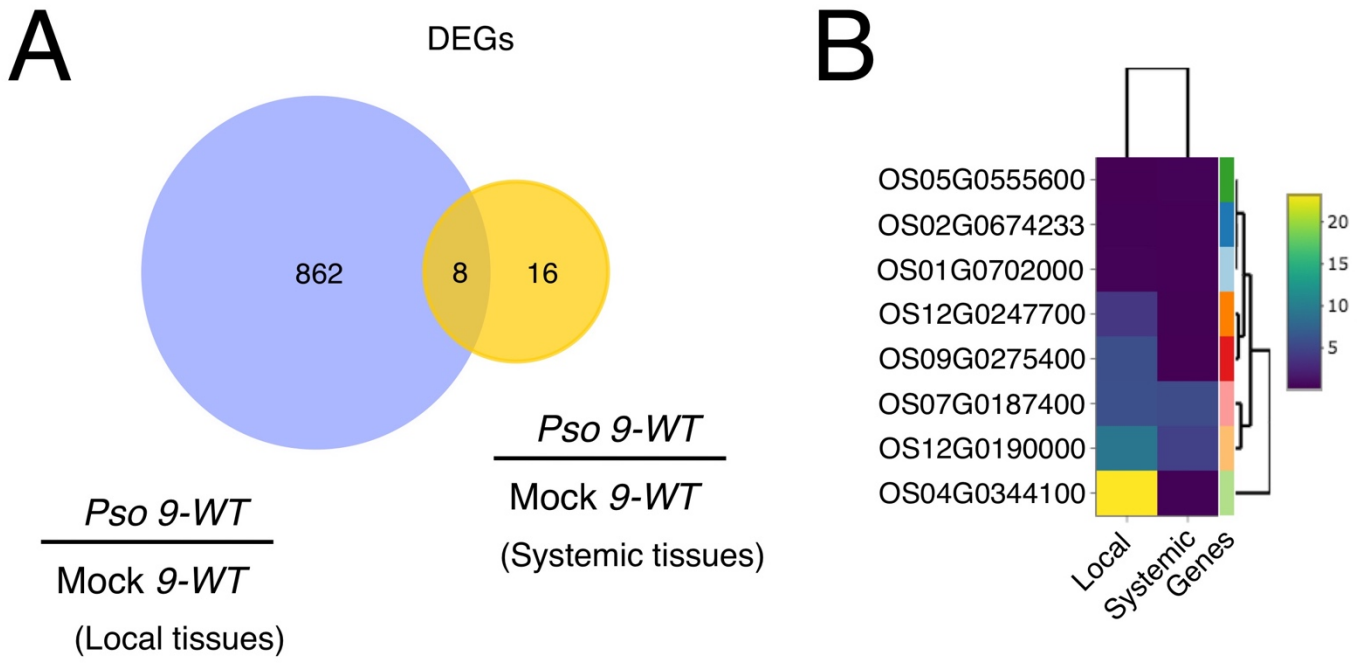

**Figure S17**

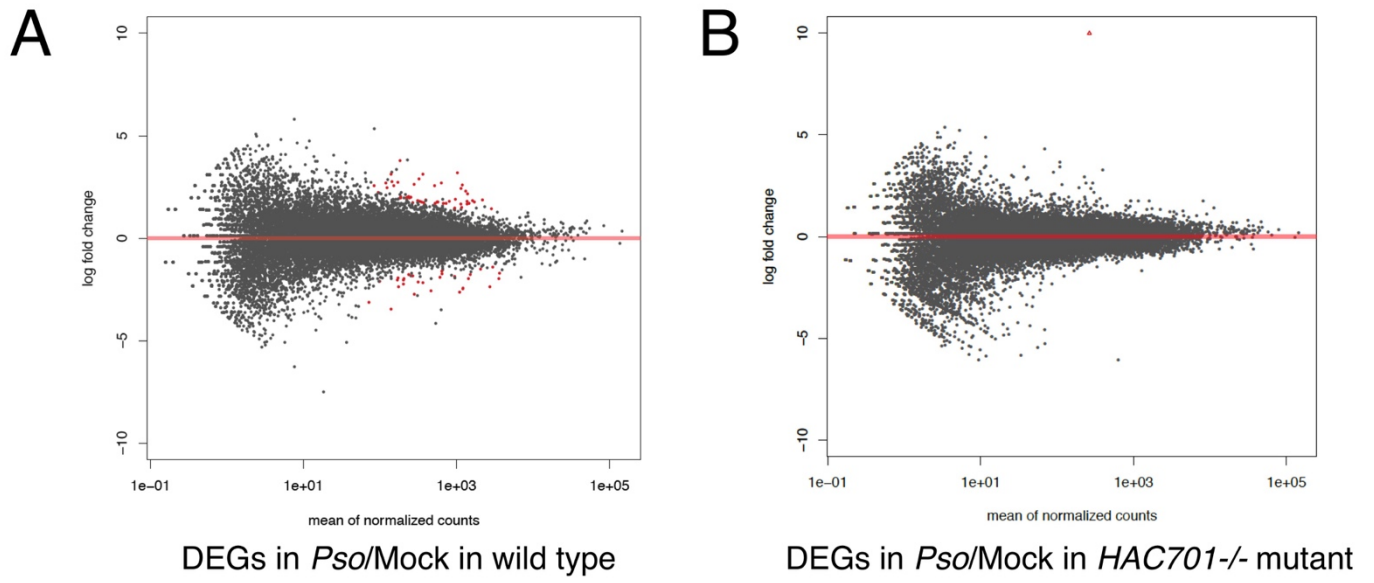

**Systemic tissues**

Figure S18

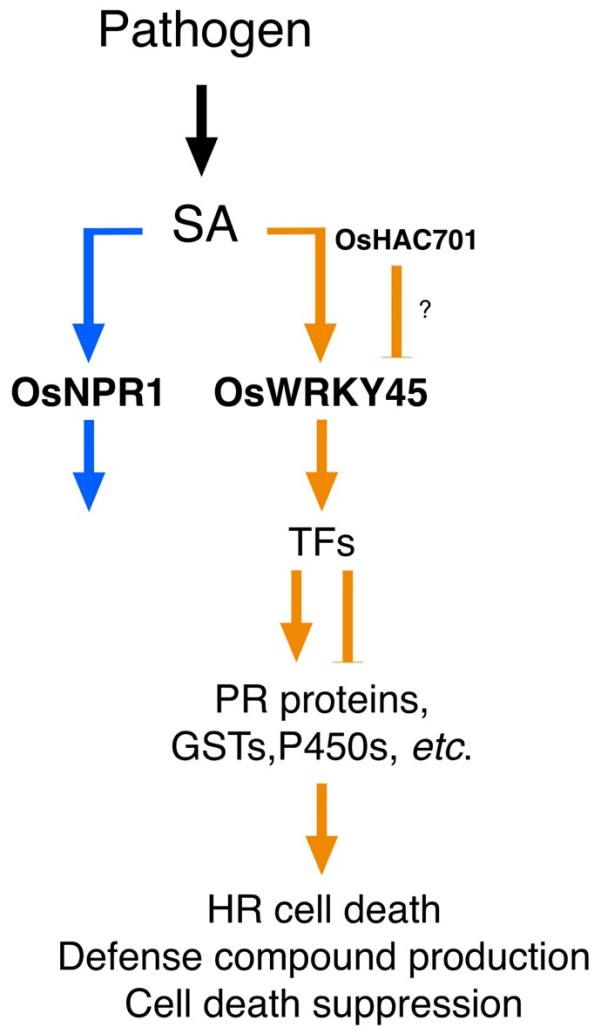

Source: https://www.biorxiv.org/content/10.1101/2020.08.26.268797v2.full.pdf
